1 **CRISPAItRations: a validated cloud-based approach for interrogation of double-**  
2 **strand break repair mediated by CRISPR genome editing**

3 **Gavin Kurgan<sup>1</sup>, Rolf Turk<sup>1</sup>, Heng Li<sup>2</sup>, Nathan Roberts<sup>1</sup>, Garrett R. Rettig<sup>1</sup>, Ashley M. Jacobi<sup>1</sup>, Lauren**  
4 **Tso<sup>1</sup>, Massimo Mertens<sup>3</sup>, Roel Noten<sup>3</sup>, Kurt Florus<sup>3</sup>, Mark A. Behlke<sup>1</sup>, Yu Wang<sup>1</sup>, and Matthew S.**  
5 **McNeill<sup>1</sup>**

6 <sup>1</sup>Integrated DNA Technologies, Coralville, IA 52241, USA; <sup>2</sup>Department of Data Sciences, Dana-Farber  
7 Cancer Institute, Boston, MA 02215; <sup>3</sup>Illumina Inc., San Diego, CA 92122

8 Correspondence should be addressed to M.S.M. ([mmcneill@idtdna.com](mailto:mmcneill@idtdna.com))

9 Short Title: Validated cloud-based analysis of CRISPR DSBs

10

11 **Abstract**

12 CRISPR systems enable targeted genome editing in a wide variety of organisms by introducing single- or  
13 double-strand DNA breaks, which are repaired using endogenous molecular pathways. Characterization  
14 of on- and off-target editing events from CRISPR proteins can be evaluated using targeted genome  
15 resequencing. We characterized DNA repair footprints that result from non-homologous end joining  
16 (NHEJ) after double stranded breaks (DSBs) were introduced by Cas9 or Cas12a for >500 paired  
17 treatment/control experiments. We found that building our understanding into a novel analysis tool  
18 (CRISPAItRations) improved results' quality. We validated our software using simulated rhAmpSeq™  
19 amplicon sequencing data (11 gRNAs and 603 on- and off-target locations) and demonstrate that  
20 CRISPAItRations outperforms other publicly available software tools in accurately annotating CRISPR-  
21 associated indels and homology directed repair (HDR) events. We enable non-bioinformaticians to use  
22 CRISPAItRations by developing a web-accessible, cloud-hosted deployment, which allows rapid batch  
23 processing of samples in a graphical user-interface (GUI) and complies with HIPAA security standards.  
24 By ensuring that our software is thoroughly tested, version controlled, and supported with a UI we enable

25 resequencing analysis of CRISPR genome editing experiments to researchers no matter their skill in  
26 bioinformatics.

## 27 **Introduction**

28 The use of programmable, targeted endonucleases has revolutionized the field of therapeutic genetic  
29 engineering<sup>1</sup>. CRISPR enzymes form a ribonucleoprotein (RNP) when hybridized with either a 2-part  
30 (crRNA + tracrRNA) or a single guide RNA (sgRNA), enabling flexible targeting to genomic loci. With  
31 either approach, a short, ~20 nucleotide spacer sequence, which is part of the guide RNA (gRNA), targets  
32 DNA with complementarity to the gRNA sequence and introduces a double-strand break (DSB), which  
33 can be repaired by non-homologous end-joining (NHEJ) or homology directed repair (HDR)<sup>2</sup>. The NHEJ  
34 pathway ligates broken DNA ends and may modify broken ends to find a biochemically favorable ligation  
35 product, generating insertions, deletions, and substitutions<sup>3</sup>. The accurate detection and quantification of  
36 these editing events at both on- and off-target locations is paramount to ensuring safety for therapeutic  
37 applications of CRISPR.

38 Producing safety information for genome editing therapeutics first involves nomination and interrogation  
39 of a set of putative affected off-target genomic loci utilizing *in-vivo*<sup>4,5</sup>, *in-vitro*<sup>6,7</sup>, and/or *in-silico*<sup>8</sup> methods.  
40 After off-target nomination has been performed, alterations in gRNA structure, delivery mechanism, and  
41 endonuclease properties can decrease off-target editing effects<sup>9</sup>. Importantly, the use of high-activity and  
42 -specificity nucleases<sup>10–13</sup> in combination with delivery mechanisms that limit nuclease exposure time (e.g.  
43 RNP delivery) can reduce off-target editing down to levels that are below the standard Illumina Next-  
44 Generation Sequencing (NGS) noise rates<sup>13</sup>. During therapeutic optimization, simultaneous quantification  
45 of editing at on- and off-target loci can then be used to expediently determine when sufficient efficacy and  
46 specificity has been achieved.

47 A number of methods have been developed to quantify the population of alleles after editing, including  
48 heteroduplex cleavage assays<sup>14–16</sup>, capillary electrophoresis<sup>17</sup>, sanger deconvolution (TIDE/ICE)<sup>18,19</sup> and  
49 next generation sequencing (NGS)<sup>20–23</sup>. Limitations have been described for non-NGS based detection  
50 methods, including: limited effective editing range<sup>24</sup>, low sensitivity<sup>25,26</sup>, indel size and type limitations<sup>14,18</sup>,  
51 low allelic frequency resolution<sup>26</sup>, and reliance on high quality sanger traces<sup>19,26</sup>. Thus, NGS has become

52 the gold standard for high-throughput accurate genome editing detection<sup>27</sup>, and it is the only method  
53 capable of simultaneously quantifying editing at both on- and off-target locations in highly multiplexed  
54 samples.

55 Specialized software tools have been developed to characterize and quantify allelic diversity after a  
56 CRISPR experiment from NGS data, but these tools have not yet been comprehensively validated using  
57 a genomic scale ground truth<sup>20–22</sup>. These tools generally align NGS reads to a reference sequence by  
58 scoring matches, mismatches and missing (gap) aligned nucleotides, selecting the highest scoring of the  
59 possible alignments, and annotating allelic variants within a certain distance from the predicted enzyme  
60 cut site<sup>20–23</sup>. These tools are challenged by the occurrence of repetitive components in the reference or  
61 edited sequences, requiring the algorithm to arbitrarily choose between multiple highly and equally scored  
62 alignment options (i.e. secondary alignments), which affect the accuracy of the results<sup>21</sup>. Recently  
63 developed tools partially overcome this challenge by prioritizing selection of indel events at the predicted  
64 cut site<sup>21,22</sup>, but this approach has not yet been comprehensively validated by examining alleles resulting  
65 from Cas9 (blunt cut 3bp from 3' gRNA end) or Cas12a (two variable nick positions, staggered 4-5bp from  
66 3' gRNA end) DSB repair events<sup>28–31</sup>.

67 In this work, we develop a software tool, CRISPAItRations, for the analysis of NGS data generated from  
68 amplicon resequencing of CRISPR edited DNA. We characterized the editing profiles of 516 unique on-  
69 target guides for two CRISPR-Cas systems: Cas9 and Cas12a. We demonstrate a novel CRISPR-Cas  
70 enzyme-specific aligner and optimized application parameters to characterize indel profiles, which  
71 together improve the results' quality. We validate this software tool by benchmarking our software tool  
72 against other popular NGS analysis software tools using synthetic NGS data generated to represent 11  
73 gRNAs with a total of 603 GUIDE-Seq<sup>4</sup> nominated on- and off-target pairs that span a wide variety of  
74 genomic sequence features with experimentally modeled indels. Finally, we develop a web-accessible  
75 graphical user-interface (GUI) to run CRISPAItRations with cloud resources to empower scientists to  
76 securely analyze data and visualize results

77

78

79 **Results**

80 **Iterative characterization and refinement of Cas9/Cas12a editing profiles**

81 *Software tool iteration 1*

82 To begin, we created a pipeline with no preferential indel realignment, prior to characterization of the  
83 positional prevalence and type of edits (i.e., population alleles resulting from DSB repair) induced by IDT  
84 Alt-R S.p. Cas9 V3 (Cas9) or IDT Alt-R A.s. Cas12a Ultra V3 (Cas12a) in Jurkat cells (Figure S1, Figure  
85 S2). For Cas9 (n=273; average read depth=17,518), indel mutations generally intersected the canonical  
86 cut site (median 66% of insertions and 80% of deletions). For Cas12a (n=243; average read  
87 depth=7,416), insertions were mostly bounded (median frequency >2%) within a -9 to +2bp window from  
88 the PAM-distal nick site (median 3-9% per position) (Figure S2). A median of 84% of deletions overlapped  
89 with either the PAM-proximal or distal nick site for Cas12a (Figure S2).

90 *Software tool iteration 2*

91 Upon observing that reads containing indels often had equally scored secondary alignments, we  
92 performed a round of iterative optimization using our novel position-specific Needleman-Wunsch (psnw)  
93 alignment algorithm. We use psnw to re-align the NGS reads described above to the reference sequence  
94 using a modified position-specific gap-open/extension vector (scoring vector), which positively scores  
95 alignments at or overlapping the cut site or PAM-distal nick site (for Cas12a), similar to previous work<sup>21</sup>  
96 (Figure S3). For Cas9, this increased the prevalence of insertions intersecting the cut site (median 95%),  
97 but indels remained bounded at non-canonical cut site positions (Figure S3). For example, a median of  
98 1.8% of total insertion events were bounded -1bp 5' of the canonical Cas9 cut position. For Cas12a, this  
99 increased the prevalence of insertions intersecting the PAM-distal nick site from a median of 7% to 24%.  
100 Indels were bounded by positions other than cut sites for both Cas9 and Cas12a, and variability of  
101 insertion start positions was higher for Cas12a compared to Cas9 (Figure S3, Figure S4). Cas12a indels  
102 were bounded between the two nick sites, and as far as -5bp 5' of the PAM-proximal cut to +4bp 3' of the  
103 PAM-distal cut. Deletion position profiles for the two enzymes mostly remained the same after this  
104 iteration (Figure S3, Figure S4).

105 *Software tool iteration 3*

106 With these characterized indel profiles, we further optimized the scoring vector to take a new position-  
107 based gap open/extension scoring vector that spanned the entire variant detection window (+/- 20  
108 nucleotides around the cut sites) to select secondary alignments with indels closer to the cut/nick site(s)  
109 and indels boundaries enriched in experimental data (Figure 2). This increased indels that were bounded  
110 at the -1bp cut position of Cas9 to a median of 2.6% of events (Figure 2A). For Cas9, the majority of  
111 insertion events remained at the canonical cut site (median 95%) and -1bp position (median 2.6%), with  
112 rare events of insertions at the -2bp (median 0.7%) or +1bp (median 0.4%) positions (Figure 2A,B). For  
113 Cas12a, a median of 18% of insertion events occurred at the PAM-proximal nick site. We observed a  
114 median of 57% of insertion events did not occur at either the PAM-distal or proximal nick site (Figure 2D).  
115 This optimization brought indels closer to the cut site(s), even if the indel may not have been introduced  
116 at a canonical cut position.

### 117 **Optimization of the variant detection window limits noise**

118 The variant detection window is a common configurable parameter for CRISPR genome editing  
119 quantification software that limits variant calling to a set distance from a predicted DSB, which limits the  
120 number of collected false-positive events. To provide a recommended window for quantifying CRISPR  
121 editing events in CRISPAItRations, we compared the difference in indel editing events observed in  
122 previously used paired treatment and control samples for Cas9/Cas12a in Jurkat cells across a +/- 20bp  
123 window from the cut site (or PAM-distal cut site for Cas12a). We determined the optimal window size to  
124 be the size at which the median difference of calculated indel editing between treatment and control  
125 samples was less than 0.1%. Using this rationale, we find that an optimal window can be defined as +/-  
126 8bp for Cas9 (Figure 3A) and +/- 12bp for Cas12a (Figure S5). However, we found that if the center of the  
127 Cas12a window is shifted -3bp from the PAM distal cut site, the optimal variant window can be decreased  
128 to +/- 9bp (Figure 3B). Application of this optimal window results in a median decrease in total false-  
129 positive indel signal from control samples by 60% as compared to a window size of 20 for both Cas9 and  
130 Cas12a while retaining >98% total indel results from treated cells (Figure 3C, Figure 3D). We set these  
131 window sizes as the recommended defaults for variant detection in CRISPAItRations.

### 132 **Benchmarking of pipeline on- and off-target specificity performance using synthetic datasets**

133 We created a multiplex, synthetic specificity dataset, containing 603 targets, representing performance of  
134 11 gRNAs with indels modeled on observed Cas9 or Cas12a repair events (Figure S6). We created 4,000  
135 synthetic reads per target (50% edited), and we modeled 100 insertion (1-15bp) and 100 deletion (1-  
136 25bp) events for a total 120,600 unique indel events (Figure S6). We then validated the performance of  
137 CRISPAItRations, and we compared performance with Amplican, CRISPResso, and CRISPResso2.  
138 CRISPAItRations calculated the indel percentage within 0.1% of the expected editing level for 99.5%  
139 (600/603) of synthetic Cas9 and Cas12a targets (Figure 4). The three erroneous targets were the result of  
140 poor paired-end read merging in regions containing long stretches of homopolymers or repetitive  
141 sequence. Observed editing at affected targets deviated from the expected indel percentage by <2%  
142 using CRISPAItRations.

143 We examined the same targets using comparable software tools. The percentage of targets that exceed  
144 2% deviation from the expected Cas9/Cas12a indel percentage for alternative software tools were  
145 72.4%/73.5% (Amplican), 94.5%/99.2% (CRISPResso), 22.4%/100.0% (CRISPResso2), and 1.7%/1.7%  
146 (CRISPResso2 with the optimized window parameter derived from Figure 3 and Figure S5) (Figure 4).

#### 147 **Benchmarking of pipeline on-target HDR accuracy**

148 We created a second synthetic Cas9 on-target dataset (a subset of 91 targets from the previous dataset  
149 with equivalent performance between tools) to simulate the performance of the two best performing  
150 pipelines, CRISPResso2 and CRISPAItRations, at quantifying HDR rates with a ground truth. This  
151 dataset contained each target with a heterogeneous set of events including non-edited events (15%),  
152 NHEJ indel events (25%), non-HDR donor integration (15%), imperfect HDR events (15%), and a perfect  
153 HDR event (30%). HDR donors were designed to either generate deletions (3, 10, 20, 40bp) or insertions  
154 (3, 25, 50, 100bp) within 8bp of the cut site (Methods). The CRISPResso2 software tool was not able to  
155 complete data processing on 4 target sites (4.3% total sites) due to an unhandled exception that was not  
156 previously present when using the “CRISPRessoPooled” analysis mode on the same sites in the  
157 synthetic specificity dataset (Data not shown). These data points were excluded from represented  
158 analysis results for CRISPResso2 (Figure 5).

159 CRISPAItRations correctly characterized the percent perfect HDR repair at 100% of sites with <2%  
160 deviation from truth. CRISPResso2 overestimates the percent perfect HDR repair events by >2% at 43%  
161 of sites (Figure 5A). Synthetic HDR-mediated insertions of 50 and 100bp cause the percent perfect HDR  
162 of CRISPAItRations to deviate 1-2% below expectation due to the increased probability of SNPs from  
163 sequencing errors to occur in these regions (Figure 5B). In contrast, CRISPResso2 does not account for  
164 any unexpected SNPs in or near the HDR event in its annotation of percent perfect HDR, which means  
165 that any sequencing or polymerase error, naturally occurring mutations, or incomplete HDR events (e.g. 3  
166 out of 4 SNPs successfully incorporated) are not accounted for in its quantification. Both software tools  
167 correctly characterize the proportion of CRISPR edited cells at 100% of targets, demonstrating that these  
168 differences are not previously identified issues in annotating editing efficiency (Figure 5C).  
169 CRISPAItRations also outperforms CRISPResso2 in its ability to characterize an event as derived from  
170 the HDR (imperfect) vs NHEJ pathway at 27 targets (30% of sites) (Figure 5). Overall, CRISPAItRations  
171 better characterized HDR editing events in the dataset.

## 172 **Using CRISPAItRations to describe mutation profiles of Cas9/Cas12a**

173 We characterized enzyme-dependent (Jurkat/Cas9 vs Jurkat/Cas12a) and cell-line dependent  
174 (Jurkat/Cas9 vs HAP1/Cas9) effects on mutation profiles (i.e. indel sizes/types and putative repair  
175 pathway) resulting from gene-editing using the improved mutation dissemination present in  
176 CRISPAItRations.

177 Across the 273 targets, Cas9 indel profiles were cell-line dependent. Editing efficiency was >50% in  
178 >92% of Cas9 targets for HAP1 and Jurkat cell-lines (Figure S7). The most prevalent mutations in Jurkat  
179 cells edited with Cas9 were insertions (median 81%), and a 2bp insertion (median 16%) was the most  
180 prominent indel event overall (Figure 6). In contrast, deletions were most prevalent in HAP1 cells (median  
181 75%), and a 1bp insertion (median 18%) was the most prominent indel event overall (Figure 6).  
182 Templated insertions (duplication of 1+ nucleotides adjacent to the DSB site) are thought to be a primary  
183 mechanism by which insertions are introduced into the genome from repair of DSB events<sup>32</sup>. Insertions in  
184 HAP1 cells are predominantly introduced by templated repair events (median 74%). In contrast, insertions  
185 in Jurkat cells are introduced by templated repair less frequently (median 8%; Figure 6A). A fraction of  
186 insertion events (median 16%) were derived from a non-templated insertion of a repeat of guanine and

187 cytosine nucleotides (GC insertions) of >1bp, an event that did not appear as often in HAP1 cells (median  
188 <1%) (Figure 6A). Both cell types derive a fraction of the total deletions from microhomology mediated  
189 end-joining (MMEJ) events (deletions with >1bp of exact microhomology; Methods). Deletions mediated  
190 by MMEJ were higher in HAP1 (median 43%) compared to Jurkat cells (median 21%; Figure 6A).

191 Comparison of Cas9 targets to the 243 Cas12a targets demonstrated that indel profiles in Jurkat are  
192 enzyme dependent (Figure 6, Figure S8). The most prevalent mutation in Jurkat cells edited with Cas12a  
193 were deletions (median 90%) and a 1bp deletion was the most prevalent event (median 8%; Figure 6).  
194 Insertions mediated by Cas12a editing in Jurkat cells had low frequencies of templated insertions (median  
195 12%). GC insertions were also observed to occur (median 18%) with Cas12a editing (Figure 6A). The  
196 normalized abundance of GC insertions was not significantly different ( $p > 0.05$ ) in Jurkat cells whether  
197 Cas9 or Cas12a was used for editing (Figure 6A). DSB repairs mediated by MMEJ were higher with  
198 Cas12a (median 31%) compared to Cas9 (median 21%; Figure 6A). Deletion mutations resulting from  
199 Cas12a editing were also 6-fold larger than that of Cas9 in Jurkat cells (Figure 6B).

200 To better understand if mutation profiles could be predicted *a priori*, we compared the spectrum of indels  
201 observed to predictions made by *in-silico* repair profile prediction tools, inDelphi<sup>33</sup> and FORECasT<sup>34</sup>, for  
202 all previous targets in Jurkat and HAP1 cells. Both tools perform best when compared to DSB repair  
203 events in HAP1 cells with Cas9. In general, FORECasT more accurately predicted the most prevalent  
204 mutation, while inDelphi more accurately predicted the spectrum of which indels were observed (Figure  
205 S9). For HAP1 cells, FORECasT and inDelphi correctly predict the top mutation event 47% and 41% of  
206 the time, respectively (Figure S9B). Both FORECasT and inDelphi predict the outcomes of Jurkat cells  
207 edited with Cas9 less accurately, and only predicted the most prevalent mutation type 14% and 10% of  
208 the time, respectively (Figure S9B). Both tools predict the repair profiles for Jurkat cells treated with  
209 Cas12a (median KL = 0.9) better than Cas9 (median KL = 2.0-2.5; Figure S9A). All predictions made at  
210 the canonical cut site of these enzymes are better than those made away from the cut site (-3bp 5' of cut  
211 site) in the same sequence (Figure S9). Predicted frameshift frequencies of both tools correlate with  
212 observed results ( $R^2 > 0.6$ ), although FORECasT outperforms inDelphi for all cell-line/enzyme  
213 combinations (Figure S9).



## 214 **Recommendations for experimental read depth requirements and tool limits**

215 We analyzed and subsampled CRISPR NGS data from a series of on- and off-target rhAmpSeq panels (2  
216 panels; 91 and 50 targets) with a wide range of editing frequencies to determine the relationship between  
217 read depth and precision. There is an inverse relationship between editing efficiency and number of reads  
218 needed to accurately quantify editing (Figure 7). We find that with target coverage >1,000 paired reads  
219 per site, >0.5 % indels can be calculated with deviation less than +/- 0.2% indels (Figure 7).

220 We evaluated detection limitations using serially diluted DNA standards with rhAmpSeq™ library  
221 preparation (IDT, USA) sequenced using Illumina paired-end sequencing. Without any type of  
222 background subtraction, the fraction of indels deviated by ~0.2% from the expected standard  
223 concentration as indel editing efficiencies approach <1% (Figure S10). After accounting for the indel error  
224 rate in a wildtype template using background subtraction, indel editing correlates with expectation (<0.1%  
225 deviation) down to 0.1% indel editing (Figure S10).

226 To better understand the background indel frequencies at diverse genomic loci, we evaluated the indel  
227 percentages in unedited control samples at all 273 unique gRNA sites for Cas9 in both HAP1 and Jurkat  
228 cell lines. Background indel mutation rates ranged between 0.0-1.0%, depending on genomic locus. Indel  
229 mutation frequencies in control samples were found to exceed 0.1% indels ~20% and ~60% of the time  
230 for HAP1 and Jurkat cells, respectively. Additionally, for the same set of loci, the limit of blank (LoB) that  
231 could be expected in an unedited sample was 2-fold higher in Jurkat cells compared to HAP1 cells  
232 (Figure S11). This demonstrates that background indel frequencies can exceed 0.5%, which is above the  
233 reported noise rate of Illumina MiSeq instruments<sup>35</sup> (Figure S11).

## 234 **Integration of CRISPAItRations into a cloud platform with a versatile web user-interface**

235 Running computational pipelines can be time-consuming on personal machines and non-intuitive for  
236 those unfamiliar with programming interfaces. Thus, we created a web site utilizing cloud-hosted  
237 computational resources to run the CRISPAItRations software tool. The web site enables either single or  
238 batch file upload of demultiplexed sequencing data files (FASTQ) directly into a cloud-based storage  
239 system from a drag-and-drop interface or streamed directly from a sequencer, hard drive, or cloud backup  
240 location into the web site. In addition, batch sample analysis is enabled by providing a configuration file

241 (i.e, CSV), and results are summarized in a single report. The web site enables interactive visualization of  
242 run metrics including percent editing/frameshift/repair pathway information, percent SNPs for base editing  
243 experiments and a heatmap pileup of all allelic frequencies aligned to the reference sequence for  
244 visualizing the variant population (Figure 8). In addition to gene editing event summarization, we provide  
245 information regarding the performance of the sequencing library and library prep technique used including  
246 percentage reads passing QC filters, primer-dimers, uniformity (for multiplex amplification panels) and  
247 troubleshooting documents to enable end-users to identify and troubleshoot problematic samples or  
248 sequencing runs.

249 We compared runtime performance metrics between CRISPAItRations and publicly available tools  
250 processing two synthetic multiplex samples from our on- and off-target benchmarking dataset at various  
251 read depth (Figure S12). On common, local hardware, our software runtime is comparable to  
252 CRISPResso2 (<40% difference) or outperforms CRISPResso1/Amplican by ~200-750%. Amplican failed  
253 time benchmarking on highly multiplexed samples due to a potential unhandled parallelization error  
254 (Figure S12). Using the CRISPAItRations web site implementation, runtime is slower (17m to completion)  
255 than the local instance on a run with 14 targets (12,000 reads / target), but it remains ~10-fold faster than  
256 the CRISPResso2 web site implementation (~4h to completion) (Figure S12). The CRISPResso2 web  
257 solution also failed to complete analysis on highly multiplexed (196 targets) or large datasets (>100MB file  
258 size) representing an additional limitation (Figure S12). In addition, our web site implementation enables  
259 batch runs of thousands of samples simultaneously; while the current CRISPResso2 web site  
260 implementation has a maximum of only 4 samples in “batch mode”.

## 261 **Discussion**

262 In this work, we develop a software tool, CRISPAItRations, for the analysis of NGS data generated from  
263 CRISPR editing experiments. We incorporated knowledge of characterized indel profiles of Cas9/Cas12a  
264 into the algorithm, which enhances CRISPR indel detection accuracy. We furthermore show that  
265 optimization of the variant detection window reduces false-positive rate, and increases true positive  
266 variant calling in Cas9 and Cas12a editing experiments. We benchmark this pipeline against other  
267 publicly available, NGS-compatible software solutions using a large synthetic dataset modeled after real  
268 Cas9 and Cas12a editing profiles. We demonstrate that our software tool outperforms other available

269 tools. We further demonstrate the utility in CRISPAItRations' ability to characterize repair profile  
270 information, by showing that DSB repair profiles are both enzyme and cell-line specific. Lastly, we provide  
271 general experimental recommendations grounded in data for performing CRISPR NGS experiments and  
272 access to our tool via a distributed cloud-based web solution with an easy-to-use web site.

273 Insertions through the NHEJ pathway are primarily introduced at a DSB site. These insertions can be  
274 derived from a number of molecular mechanisms including misalignment of microhomologies in cleaved  
275 DNA products, staggered overhangs from the cleavage event followed by gap-filling, and/or template-  
276 independent polymerase extension<sup>36</sup>. Our quantification of positional insertion prevalence provides  
277 unambiguous evidence that insertion events are observed at non-canonical cut site positions, suggesting  
278 additional positions that may be subjected to rare endonucleolytic cleavage. It was recently found that  
279 Cas9 endonucleolytic cleavage of the non-targeted DNA by the RuvC domain can vary in position relative  
280 to the HNH domain cut site to generate a staggered DSB<sup>37</sup>. This in combination with variable degrees of  
281 5' to 3' end-processing may explain the positional occurrence of insertions during repair of DSBs  
282 introduced by Cas9. For Cas12a we observe a diverse spectrum of positions between +3 bases 3' of the  
283 PAM distal cut site and -5 bases 5' of the PAM proximal cut site where insertions occur, suggesting a  
284 wide range of locations involved in endonucleolytic cleavage and repair. This provides an increased level  
285 of resolution on previous work, which has shown that Cas12a cleavage products are diverse and both  
286 enzyme and sequence specific<sup>28-30</sup>. This leads us to the conclusion that Cas9 and Cas12a genome  
287 editing lead to DSB repair events that cannot be found if only narrow windows (i.e. 1-2 bp) around cut  
288 sites are interrogated for variants, a challenge which CRISPAItRations solves with optimized parameter  
289 defaults. To the best of our knowledge, this is the first report of the positional prevalence of repair  
290 products of Cas9/Cas12a across a wide variety of target sites.

291 We also demonstrate that indel repair profiles vary with cell- and enzyme-type. Our results support other  
292 findings that Cas12a is prone to larger deletions on average when compared to Cas9<sup>38</sup>. Larger deletions  
293 have also been shown to be indicative of MMEJ-related repair events<sup>39</sup>. In agreement with this, we find  
294 that putative MMEJ events are more predominant in Cas12a deletions compared to Cas9, within the  
295 same cell line, suggesting that DSB mechanism contributes to repair pathway preference. Additionally,

296 deletions derived from Cas9 editing in HAP1 cells appear to be more prone to MMEJ than Jurkat cells,  
297 suggesting MMEJ prevalence is cell-line dependent due to differences in repair pathway  
298 expression/activity. Other mutations such as templated insertions have been reported after Cas9 editing,  
299 and they are thought to be the main mechanism by which insertions are introduced during DSB repair<sup>32</sup>.  
300 Here we provide evidence that templated insertion prevalence after DSB repair is largely dependent on  
301 cell-type, too. The Jurkat cell line has a relatively low frequency of templated insertions, but Jurkat cells  
302 had a higher frequency of >1bp insertions containing primarily GC motifs. Future work should address if  
303 this type of mutation pattern is widespread in clinically relevant cell-types and identify if it is sourced from  
304 a nucleotide bias in a template-independent polymerase. These and other less characterized repair  
305 events are poorly predicted in the current generation of *in-silico* indel prediction tools as well, leading to  
306 poor performance on Jurkat cells where template-independent mutations are most prevalent. This is likely  
307 due to limited repair profile diversity in cell-types used for training these models. In the future, these or  
308 new tools could be improved by identifying biomarkers predictive of differential repair outcomes to ensure  
309 sufficiently diverse modeling data is generated.

310 Validation and stability of software has traditionally been an overlooked aspect in bioinformatics program  
311 development<sup>40</sup>. Two of the publicly available software tools we evaluated generated uncaught exceptions  
312 or run failures at the command-line and web interface on runs that would be reasonably generated for an  
313 individual experiment. Additionally, all evaluated software tools were found to inaccurately annotate  
314 variants in our benchmarking datasets. Issues resulting in software tool inaccuracies include, but are not  
315 limited to, 1) improper target:read assignment, 2) suboptimal read merging strategies, 3) suboptimal  
316 alignment strategies, 4) problematic filters/defaults, and 5) general programming errors. Amplican's  
317 performance on this dataset was particularly surprising, and it is primarily caused by the chosen  
318 read:target assignment strategy using a string match of the primer binding site based on exact read  
319 content. Although we enabled an extra 1bp of ambiguous content (`primer_mismatch=1`) in an attempt to  
320 account for modeled sequencing errors, a fraction of reads were still lost, resulting in inaccurate  
321 annotation. Enabling higher amounts of ambiguity in matches leads to increases in memory requirements  
322 which can cause the program to crash (Data not shown). CRISPResso1 and CRISPResso2 without an  
323 optimized window parameter is mainly affected by the prevalence of CRISPR-associated indel events

324 occurring outside of the default annotation window. Once the annotation window is extended, suboptimal  
325 read merging, alignment, and program annotation of variants seem to be primary causes of  
326 misannotation.

327 Previously developed CRISPR NGS software tools have relied on limited synthetic data or focused on  
328 experimentally-derived datasets with limited resolution on “truth”, leading to large discrepancies in  
329 accuracy of different software solutions. More established applications of variant calling software tools  
330 have experienced similar shortcomings, such as for somatic variant calling in cancer genomics<sup>41</sup>, and  
331 consortiums/researchers have developed a series of best practices, nomenclature standardizations, and  
332 gold-standard datasets for benchmarking software tools<sup>42–44</sup>. With this work we provide a more  
333 comprehensive simulated CRISPR NGS benchmarking dataset to identify limitations in analysis software  
334 tools and provide evidence that similar best-practices and standards should be established for the  
335 genome editing community. In addition, the sensitivity of many of these CRISPR NGS tools have been  
336 stated in previous work ranging from 0.01 – 0.1% editing<sup>20,21</sup>. Although we show that detection to ~0.1%  
337 indel editing is possible under ideal scenarios, this is a misleading “sensitivity” measurement as it does  
338 not account for processes that may introduce variable levels of false-positive editing signals, which may  
339 impact reliability in calling variants. This includes variability in methods used for DNA extraction, library  
340 preparation, sequencing/technical artifacts, sequence context, and even differences in intracellular milieu,  
341 which we demonstrate may be responsible for differences in background editing signal for identical loci in  
342 HAP1 and Jurkat cell lines. In other fields, such as cancer genomics, detecting variants even below 5%  
343 allelic frequency with high precision/recall is considered challenging<sup>45</sup>. Sophisticated methods  
344 incorporating unique molecular identifiers (UMIs), paired treatment/control background subtraction, and  
345 more have all been applied within the cancer genomics field to enable high specificity detection of  
346 variants at sub-1% allelic frequencies<sup>46,47</sup>. We highlight here for CRISPR NGS analysis that even  
347 background editing signal can vary dramatically based on experimental conditions, further emphasizing  
348 the need for statistical tests, replicates and other advanced methods for confident detection of low editing  
349 levels. Future work will need to incorporate error-correction sequencing strategies (e.g. UMIs) and more  
350 sophisticated background subtraction methods to increase accuracy of editing annotation.

351 As genome editing therapies enter clinical trials, it becomes a necessity that software and sequencing  
352 methods are thoroughly vetted to prevent incorrect conclusions or exclusion of variant information. This  
353 has become clear with accumulating evidence that dsDNA donor (e.g. plasmids, AAV) integrations<sup>48,49</sup>,  
354 translocations<sup>50</sup>, and large indels/rearrangements<sup>51</sup> all take place from DSB mediated genome editing.  
355 We show that for small dsDNA donors, CRISPRAltRations more accurately discriminates and quantifies  
356 NHEJ, imperfect HDR and perfect HDR than existing pipelines using simulated data. However, detection  
357 of many larger events requires advances in the use of long read sequencing and targeted  
358 hybridization/capture-based sequencing, enrichment protocols, and analysis tools. By testing, versioning,  
359 and deploying CRISPRAltRations within a cloud-hosted user-interface with reproducible code production  
360 environments and security certifications, we aim to provide a plug-and-play hardware-independent  
361 solution to generate high quality genome editing specificity data.

## 362 **Methods**

### 363 **Ribonucleoprotein complex formation**

364 Cas9 gRNAs were prepared by mixing equimolar amounts of Alt-R™ crRNA and Alt-R tracrRNA  
365 (Integrated DNA Technologies, Coralville, IA, USA) in IDT Duplex Buffer (30 mM HEPES, pH 7.5, 100  
366 mM potassium acetate; Integrated DNA Technologies), heating to 95°C and slowly cooling to room  
367 temperature or using Alt-R sgRNA (Integrated DNA Technologies) hydrated in IDTE pH 7.5 (10 mM Tris,  
368 pH 7.5, 0.1 mM EDTA; Integrated DNA Technologies). Cas12a gRNAs consisted of Alt-R™ Cas12a  
369 crRNAs (Integrated DNA Technologies) hydrated in IDTE pH 7.5. RNP complexes were assembled by  
370 combining the CRISPR-Cas nuclease (Alt-R S.p. Cas9 Nuclease V3 or Alt-R A.s. Cas12a Ultra V3;  
371 Integrated DNA Technologies) and the Alt-R gRNA at a 1.2:1 molar ratio of gRNA:protein and incubating  
372 at room temperature for 10 minutes. The target specific sequences of the gRNAs used in this study are  
373 listed in Table S1 for Cas9 and Table S2 for Cas12a. The guides chosen were either within the same  
374 general genetic context (same amplicon sequencing space; enzyme-dependent) or identical between the  
375 two cell lines (cell-line dependent) used in this study.

### 376 **Cell culture**

377 HAP1 cells were purchased from Horizon Discovery (Cambridge, UK). Jurkat E6-1 cells were purchased  
378 from ATCC® (Manassas, VA, USA). Cells were maintained in RPMI-1640 (Jurkat) or IMDM (HAP1)

379 (ATCC), each supplemented with 10% fetal bovine serum and 1% penicillin-streptomycin (Thermo Fisher  
380 Scientific, Carlsbad, CA, USA). Cells were incubated in a 37°C incubator with 5% CO<sub>2</sub>. HAP1 cells were  
381 used for transfection at 50-70% confluency. Jurkat cells were used for transfection at 5-8 x 10<sup>5</sup> cells/mL  
382 density. After transfection, cells were allowed to grow for 48-72 hours in total, after which genomic DNA  
383 was isolated using QuickExtract™ DNA Extraction Solution (Epicentre, Madison, WI, USA). We chose  
384 HAP1 and Jurkat since they are derived from human chronic myelogenous leukemia and T lymphocyte  
385 cell lines, which are derived from cell types that are similar to those that have been best studied in the  
386 context of predicting Cas9 repair profiles<sup>33,34,52</sup>.

### 387 **Delivery of genome editing reagents by nucleofection**

388 Electroporation was performed using the Lonza™ Nucleofector™ 96-well Shuttle™ System (Lonza,  
389 Basel, Switzerland). For each nucleofection, cells were washed with 1X PBS and resuspended in 20 µL of  
390 solution SF or SE (Lonza). Then, cell suspensions were combined with an RNP complex. For Cas9, the  
391 RNP concentration was 4 µM with 4 µM Alt-R Cas9 Electroporation Enhancer. For Cas12a, the RNP  
392 concentration was a suboptimal dose of 0.2 µM with 3 µM Alt-R Cas12 Electroporation Enhancer  
393 (Integrated DNA Technologies) to provide a more diverse range of editing frequencies. This mixture was  
394 transferred into one well of a Nucleocuvette™ Plate (Lonza) and electroporated using manufacturer's  
395 recommended protocols. After nucleofection, 75 µL pre-warmed culture media was added to the cell  
396 mixture in the cuvette, mixed by pipetting, and 25 µL was transferred to a 96-well culture plate with 175  
397 µL pre-warmed culture media. Transfection plates were incubated at 37°C and 5% CO<sub>2</sub>.

### 398 **Quantification of editing by next-generation sequencing (NGS)**

399 On-target editing efficiency for Cas9/Cas12a nucleofected cells was measured by NGS. Libraries were  
400 prepared using a previously described rhAmpSeq amplification-based method<sup>53</sup>. Briefly, the first round of  
401 PCR was performed using target specific primers. A second round of PCR was used to incorporate P5  
402 and P7 Illumina adapters to the ends of the amplicons for universal amplification. Libraries were purified  
403 using Agencourt® AMPure® XP system (Beckman Coulter, Brea, CA, USA), and quantified with qPCR  
404 before loading onto the Illumina® MiSeq platform (Illumina, San Diego, CA, USA). Paired end, 150 bp  
405 reads were sequenced using V2 chemistry. Data were demultiplexed using Picard tools v2.9  
406 (<https://github.com/broadinstitute/picard>).



## 407 **CRISPAItRations algorithm**

408 We developed the CRISPAItRations software tool in python, and it plus other software tools are together  
409 managed by a snakemake or CWL workflow manager (Figure 1) <sup>54,55</sup>. The software is hosted with a front-  
410 end graphical user interface (UI) at (<https://idtcrispr.bluebee.com/idtcrispr/#!login>). The UI enables the  
411 end-user to specify run information, which is used to partition computational resources hosted in the cloud  
412 to perform all data processing using the CRISPAItRations software tool. Results can be visualized and  
413 downloaded from the UI. Sequencing data stored in the cloud (AWS, BaseSpace, Google) or on local  
414 data stores can be automatically synced with the platform using or uploaded through a “drag-and-drop”  
415 mechanism within the UI. Data are processed in region specific data centers, duplicated, and protected in  
416 a manner that is GDPR, HIPAA, DSPT, PHIPA, PIPEDA, and CSL compliant.

417 The CRISPAItRations software tool workflow starts from demultiplexed FASTQ files as input along with  
418 guide and amplicon information in the form of strings or six-column BED-formatted genomic coordinates.  
419 The pipeline assumes that the end-user has generated Illumina sequencing data (single or paired-end) in  
420 FASTQ format and that the reads completely span the cut site in both directions after merging of R1/R2  
421 pairs. If genomic coordinates are provided in BED file format, amplicon and guide sequences are  
422 extracted from the selected genome and paired using bedtools<sup>56</sup>. Next, low quality reads and Illumina  
423 sequencing adapters are removed using FASTP<sup>57</sup> (--  
424 adapter\_sequence=AGATCGGAAGAGCACACGTCTGAACTCCAGTCA; --  
425 adapter\_sequence\_r2=AGATCGGAAGAGCGTCGTGTAGGGAAAGAGTGT; -L; -n=10; -q=15; -u=30). If  
426 paired-end data were used, read pairs are merged into a single fragment using FLASH<sup>58</sup> (-O flag used).  
427 Putative primer dimers are identified based on a size limit (<60bp reads), annotated by homology to  
428 known amplicon sequences, and removed from downstream analysis. The remaining reads are then  
429 mapped to all potential amplicon targets using minimap2<sup>59</sup> (default parameters). The mapped reads are  
430 separated into amplicon target-specific BAM files using bamtools<sup>60</sup> to enable parallel processing of all  
431 targets. If an HDR donor was supplied, the theoretically perfect HDR event is recreated by iterating  
432 through a Needleman-Wunsch alignment with a high gap-open penalty implemented in biopython<sup>61,62</sup>  
433 (match=2; mismatch=1; gap open=-30; gap extension=0) at all potential amplicons, choosing the optimal  
434 query:target assignment, reconstructing the hypothetical sequence based on the alignment and adding



435 the hypothetical sequence to the mappable amplicons reference file. Reads are collapsed based on exact  
436 sequence identities and re-mapped to the mappable amplicons reference file using minimap2<sup>59</sup> (A=2;  
437 B=4; O=8; E=5; --secondary=no; --no-end-flt; --max-chain-iter 100000) to bin reads appropriately between  
438 events derived from HDR vs NHEJ repair pathways. Mapped reads containing indels are re-aligned using  
439 a modified Needleman-Wunsch algorithm we call psnw (<https://github.com/lh3/psnw>) that attributes an  
440 alignment score bonus to placement of gap-open or extension in specific locations in the alignment. Psnw  
441 extends the features of Needleman-Wunsch to include an elevated match/mismatch/gap open/gap  
442 extension scoring matrix (multiplied by a scalar) and a customizable position specific gap-open/extension  
443 vector giving a configurable bonus to alignments that place these features in specific positions. The  
444 scoring matrix enables the algorithm to select alignments that have gap open/extensions at desired  
445 positions. All reads with a mutation that begins within a set distance from the predicted canonical cut  
446 site(s) are annotated and summarized in the results, with a number of other visualizations and reports.

#### 447 **Variant annotation**

448 Annotation of variants is performed in a step-wise process with custom python code. First, variants are  
449 further collapsed based on their annotated nucleotide changes within range of the cut site window. Then,  
450 if an HDR donor is supplied, a variant is determined to be derived from the HDR vs NHEJ repair pathway  
451 based on the reference amplicon that the read mapped to (wildtype vs theoretical HDR event). Next, a  
452 variant is annotated as an imperfect HDR event if any SNP or indel is found within the pre-defined  
453 window from the cut site or from the location of the first mutation incorporated from the HDR event to the  
454 last, whichever is larger. Next, insertions, deletions, and insertion+deletion frequencies are quantified  
455 relative to the reference sequence.

456 Insertions are then further characterized by inspecting the sequence of the insertion and surrounding  
457 genomic context. If the sequence of an insertion is found to be an exact repeat of DNA adjacent to its  
458 insertion, it is described as a templated insertion<sup>63</sup>. If the sequence of an insertion is not found to be a  
459 templated insertion, and it is found to be composed of >1 nucleotide and contain only guanine/cytosine  
460 nucleotides, it is described as a GC insertion. These events are represented as percentages of the total  
461 number of insertions to enable easy comparison between targets.

462 Deletions are further characterized by inspecting surrounding genomic context of the deletion. If a  
463 deletion is >1 nucleotide in length and found to contain >1 nucleotide of exact microhomology from the  
464 start of the deletion to the 3' end of the remaining genomic sequence or from the end of a deletion to the  
465 5' end of the remaining genomic sequence (accounting for secondary alignments), it is annotated as a  
466 MMEJ event. MMEJ events are represented as a percentage of the total number of deletions to enable  
467 easy comparison between targets. Any events with both insertions+deletions are excluded from this  
468 analysis.

469 Indel mutations that are not multiples of 3bp are annotated as frameshifting events, independent of  
470 whether they intersect known coding sequences. For identification of the position of mutations, an  
471 insertion position is described as the 5' reference base position adjacent to the insertion. For deletions,  
472 the position is considered to be the position closest to the cut site at which a reference base is missing.  
473 Additionally, a deletion was considered to intersect the cut site if the base directly 5' of the cut/nick site  
474 was missing in the variant. Since the cut site(s) of A.s. Cas12a Ultra V3 with a 21bp spacer have not  
475 been explicitly defined, we annotated the PAM-proximal and PAM-distal nick sites to be the position  
476 between the sites where the most insertion events were observed prior to algorithm optimization.

#### 477 **Synthetic read generation for on- and off-target editing validation**

478 To create a synthetic benchmarking dataset reminiscent of CRISPR editing, we used VarSim<sup>64</sup> for  
479 generating the defined variants in a paired-end amplicon sequencing read format with an Illumina MiSeq  
480 v3 error profile and ART<sup>65</sup> to generate unmodified reads with MiSeq v3 error profiles to enable addition of  
481 "wildtype" reads with desired error-profiles. We used this to generate a synthetic dataset using sequence  
482 space from 11 real rhAmpSeq panels (Table S3) representing GUIDE-seq nominated Cas9 on- and off-  
483 target sites (n = 603 on- and off-target sites) with indels modeled based on our real Cas9/Cas12a editing  
484 events in Jurkat cells. To do this, median mutation size, position, and frequency of event types across  
485 these two datasets were used to create a series of mutation probability vectors that describe the  
486 probability of observing different editing events relative to the canonical cut site in a random guide. To  
487 create indels, mutation probability vectors were sampled to create 100 unique insertion and deletion  
488 events for each guide, each unique event with a read depth of 10 (4,000 reads per target; 50% indels;  
489 2x150 reads). It should be noted that the Cas12a sites are not true experimentally determined Cas12a

490 off-targets or binding sites, but were merely created at the same genomic positions as the Cas9 dataset  
491 to recapitulate the challenge to bin reads between on- and off-target sites with similar genomic context.

#### 492 **Synthetic read generation for on-target HDR quantification validation**

493 To create a synthetic benchmarking dataset representing the ability to perform on-target HDR  
494 quantification, we took all of on- and off-targets from the RAG1 Cas9 GUIDE-Seq panel and separated  
495 these out as single targets (91 total)<sup>25</sup>. The RAG1 panel was chosen because 1) no target processing  
496 problems were found when using CRISPResso2 and 2) the genomic sequence around the targets  
497 included homopolymers and other events that represent challenging genomic regions to annotate. We  
498 then created dsDNA donors *in-silico* (as sequence strings) with 40bp homology arms using the same  
499 synthetic generator previously described. Donors were designed to synthetically introduce a mutation at  
500 each of these sites as a deletion (3, 10, 20, 40bp) or insertion (3, 25, 50, 100bp) within 8bp from the  
501 expected cut site. We modeled the dataset with simulated dsDNA donors since this introduces an  
502 additional potential complication of the actual donor sequence being directly ligated into the cleavage site  
503 which is an important event to discriminate between<sup>4,48</sup>. We made all sites have a heterogeneous set of  
504 events including non-edited events (15%), 10 unique NHEJ indel events (25%), 5 unique non-HDR donor  
505 integration (15%), 5 unique imperfect HDR events (15%), and 1 perfect HDR event (30%). NHEJ indel  
506 events were modeled using the mutation probability from Jurkat with Cas9 (see above). Integration of the  
507 donor (non-HDR donor integration) was modeled with one perfect integration of the complete dsDNA  
508 donor at the cut site and 4 imperfect integrations. Imperfect integration events were modeled with random  
509 sizes of truncations of the integration event (not to exceed 40% the full dsDNA donor size) or SNPs within  
510 the integrated donor. Imperfect HDR events were similarly modeled with either truncated events (deletion  
511 or insertion HDR events) or SNPs (insertion HDR events) within the portion of DNA that was intended to  
512 be altered by the HDR donor. Reads were simulated with MiSeq v3 noise profiles (4,000 reads per target,  
513 2x250 reads).

#### 514 **Determination of required read depth levels**

515 To provide recommendations for target sequencing read depth requirements, we re-analyzed previously  
516 published CRISPR NGS data from a series of rhAmpSeq panels designed for on/off target sites of guides  
517 targeting the RAG1/RAG2 loci with a wide range of editing frequencies, obtainable at the Sequence Read

518 Archive (SRA) under: PRJNA628100<sup>25</sup>. Reads from these samples were subsampled, without  
519 replacement, in triplicate with random seeds to a range between 5-3,000 reads pairs per site and  
520 quantified using CRISPAItRations with optimized parameters. Indel frequencies and standard deviation  
521 between all three read depth replicates were then compared to the frequency obtained using all reads for  
522 the corresponding on- and off-target site to determine deviation from expectation.

### 523 **DNA standard titration for evaluating rhAmpSeq accuracy**

524 Synthetic dsDNA templates were generated as gBlocks (Integrated DNA Technologies, USA) using  
525 simulated events at an HPRT Cas9 genomic locus (Table S4). Templates were quantified using qPCR  
526 before being pooled at equimolar concentrations. These synthetic events consisted of 10 deletions, 10  
527 insertions, and 3 SNPs spiked in to create a known mixture (43.5:43.5:13). Serial dilution was performed  
528 with varying levels of wildtype sequence ranging from 0-100% (Table S4) and subjected to the previously  
529 stated library preparation procedure followed by NGS.

### 530 **Statistical and Data Analysis**

531 Data collected from experiments were analyzed and statistics generated using Graph PadPrism 8. Editing  
532 data for Cas9/Cas12a experiments were only used if a sample had >100 merged reads obtained, and the  
533 treated sample had >5% editing. Significance was evaluated using a 2-way ANOVA with a *post hoc*  
534 Tukey multiple comparisons test (\* $p < 0.05$ , \*\* $p < 0.01$ , \*\*\* $p < 0.001$ , and \*\*\*\* $p < 0.0001$ ) for indel profile  
535 differences between Cas9 (Jurkat), Cas9(HAP1) and Cas12a(Jurkat) treatments. Limit of blank (LOB)  
536 was calculated using methods previously described<sup>66</sup>.

### 537 **Software versions and parameters utilized**

538 For benchmarking analyses the following softwares and versions were used: CRISPResso (1.0.13),  
539 CRISPResso2 (2.0.40), Amplican (1.6.2). When using Amplican, the following non-default parameters  
540 were used: average\_quality=15, min\_quality=1, primer\_mismatch=1, min\_freq=0.000001. For comparison  
541 of in-silico repair profile prediction tools the following software versions were used: inDelphi (commit tag:  
542 9ab67ca53ebb91e49aeb4530ec1e999ee9827ca1) and FORECasT (commit tag:  
543 019a2f52ba8437528298523c79c224c205146f00). For both models, the “K562” model was used for  
544 comparing performance.

## 545 **Availability**

546 The CRISPAItRations pipeline is available via a cloud-hosted web UI at <https://idtcrispr.bluebee.com/>.  
547 We provide subscription models to cover regular cloud computing usage costs, or provide the interface  
548 free-of-charge to customers utilizing rhAmpSeq products for generating their sequencing libraries. Credits  
549 to enable a trial of the service can also be obtained by contacting [crispr@idtdna.com](mailto:crispr@idtdna.com). The psnw aligner is  
550 available at <https://github.com/lh3/psnw>. All Cas-specific gap-open/extension scoring vectors (for psnw)  
551 and parameters for publicly available tools are disclosed in Methods for reproducibility.

## 552 **Acknowledgements**

553 We would like to thank the Molecular Genetics group at IDT for many helpful discussions. We would also  
554 like to thank all of the individuals who participated in testing phases of the CRISPAItRations web platform  
555 and their helpful feedback that led to an ultimately better user-interface.

556 G.K, A.J., M.M., R.T., G.R., N.R., H.L., L.T., Y.W. and M.B. are employees or paid contractors of  
557 Integrated DNA Technologies (IDT), which sells reagents used or similar to those used in this manuscript.  
558 M.M, K.F., and R.N. are both employees of Illumina Inc. which provides a productized cloud-computing  
559 platform for doing NGS analysis. All other authors declare no conflicts of interest.

## 560 **Author Contributions**

561 G.K. and M.M. performed all back-end bioinformatics pipeline creation. H.L. created the psnw alignment  
562 algorithm. M.M. designed all Cas9 and Cas12a guides. R.T and G.R. planned and performed all cell  
563 culture, nucleofection and library preparation. G.K performed optimization of different algorithm  
564 components and performed data analysis. N.R. performed gBlock template dilution experiments. L.T. and  
565 G.K developed code testing framework. R.N and K.F. created front-end web UI. G.K. wrote an initial draft.

## 566 **References**

- 567 1. Porteus, M. H. A new class of medicines through DNA editing. *N. Engl. J. Med.* (2019).  
568 doi:10.1056/NEJMra1800729
- 569 2. Carroll, D. Genome Engineering with Targetable Nucleases. *Annu. Rev. Biochem.* (2014).  
570 doi:10.1146/annurev-biochem-060713-035418

- 571 3. Stinson, B. M., Moreno, A. T., Walter, J. C. & Loparo, J. J. A Mechanism to Minimize Errors during  
572 Non-homologous End Joining. *Mol. Cell* (2020). doi:10.1016/j.molcel.2019.11.018
- 573 4. Tsai, S. Q. *et al.* GUIDE-seq enables genome-wide profiling of off-target cleavage by CRISPR-Cas  
574 nucleases. *Nat. Biotechnol.* (2015). doi:10.1038/nbt.3117
- 575 5. Wienert, B. *et al.* Unbiased detection of CRISPR off-targets in vivo using DISCOVER-Seq.  
576 *Science* (80-. ). **364**, (2019).
- 577 6. Tsai, S. Q. *et al.* CIRCLE-seq: A highly sensitive in vitro screen for genome-wide CRISPR-Cas9  
578 nuclease off-targets. *Nat. Methods* (2017). doi:10.1038/nmeth.4278
- 579 7. Lazzarotto, C. R. *et al.* CHANGE-seq reveals genetic and epigenetic effects on CRISPR-Cas9  
580 genome-wide activity. *Nat. Biotechnol.* (2020). doi:10.1038/s41587-020-0555-7
- 581 8. Cradick, T. J., Qiu, P., Lee, C. M., Fine, E. J. & Bao, G. COSMID: A web-based tool for identifying  
582 and validating CRISPR/Cas off-target sites. *Mol. Ther. - Nucleic Acids* (2014).  
583 doi:10.1038/mtna.2014.64
- 584 9. Vakulskas, C. A. & Behlke, M. A. Evaluation and reduction of crispr off-target cleavage events.  
585 *Nucleic Acid Ther.* **29**, (2019).
- 586 10. Kim, D. *et al.* Genome-wide analysis reveals specificities of Cpf1 endonucleases in human cells.  
587 *Nat. Biotechnol.* (2016). doi:10.1038/nbt.3609
- 588 11. Schmid-Burgk, J. L. *et al.* Highly Parallel Profiling of Cas9 Variant Specificity. *Mol. Cell* **78**, (2020).
- 589 12. Kleinstiver, B. P. *et al.* Engineered CRISPR-Cas12a variants with increased activities and  
590 improved targeting ranges for gene, epigenetic and base editing. *Nat. Biotechnol.* (2019).  
591 doi:10.1038/s41587-018-0011-0
- 592 13. Vakulskas, C. A. *et al.* A high-fidelity Cas9 mutant delivered as a ribonucleoprotein complex  
593 enables efficient gene editing in human hematopoietic stem and progenitor cells. *Nat. Med.*  
594 (2018). doi:10.1038/s41591-018-0137-0

- 595 14. Mashal, R. D., Koontz, J. & Sklar, J. Detection of mutations by cleavage of DNA heteroduplexes  
596 with bacteriophage resolvases. *Nat. Genet.* (1995). doi:10.1038/ng0295-177
- 597 15. Ota, S. *et al.* Efficient identification of TALEN-mediated genome modifications using heteroduplex  
598 mobility assays. *Genes to Cells* (2013). doi:10.1111/gtc.12050
- 599 16. Bhattacharya, D. & Van Meir, E. G. A simple genotyping method to detect small CRISPR-Cas9  
600 induced indels by agarose gel electrophoresis. *Sci. Rep.* (2019). doi:10.1038/s41598-019-39950-4
- 601 17. Ramlee, M. K., Yan, T., Cheung, A. M. S., Chuah, C. T. H. & Li, S. High-throughput genotyping of  
602 CRISPR/Cas9-mediated mutants using fluorescent PCR-capillary gel electrophoresis. *Sci. Rep.*  
603 (2015). doi:10.1038/srep15587
- 604 18. Hsiao, T. *et al.* Inference of CRISPR Edits from Sanger Trace Data. *bioRxiv* (2018).  
605 doi:10.1101/251082
- 606 19. Brinkman, E. K. & van Steensel, B. Rapid Quantitative Evaluation of CRISPR Genome Editing by  
607 TIDE and TIDER. in *Methods in Molecular Biology* (2019). doi:10.1007/978-1-4939-9170-9\_3
- 608 20. Pinello, L. *et al.* Analyzing CRISPR genome-editing experiments with CRISPResso. *Nature*  
609 *Biotechnology* (2016). doi:10.1038/nbt.3583
- 610 21. Clement, K. *et al.* CRISPResso2 provides accurate and rapid genome editing sequence analysis.  
611 *Nature Biotechnology* (2019). doi:10.1038/s41587-019-0032-3
- 612 22. Labun, K. *et al.* Accurate analysis of genuine CRISPR editing events with ampliCan. *Genome Res.*  
613 (2019). doi:10.1101/gr.244293.118
- 614 23. Lindsay, H. *et al.* CrispRVariants charts the mutation spectrum of genome engineering  
615 experiments. *Nature Biotechnology* (2016). doi:10.1038/nbt.3628
- 616 24. Vouillot, L., Thélie, A. & Pollet, N. Comparison of T7E1 and surveyor mismatch cleavage assays to  
617 detect mutations triggered by engineered nucleases. *G3 Genes, Genomes, Genet.* (2015).  
618 doi:10.1534/g3.114.015834

- 619 25. Shapiro, J. *et al.* Increasing CRISPR Efficiency and Measuring Its Specificity in HSPCs Using a  
620 Clinically Relevant System. *Mol. Ther. - Methods Clin. Dev.* (2020).  
621 doi:10.1016/j.omtm.2020.04.027
- 622 26. Sentmanat, M. F., Peters, S. T., Florian, C. P., Connelly, J. P. & Pruett-Miller, S. M. A Survey of  
623 Validation Strategies for CRISPR-Cas9 Editing. *Sci. Rep.* (2018). doi:10.1038/s41598-018-19441-  
624 8
- 625 27. Miller, J. C. *et al.* Enhancing gene editing specificity by attenuating DNA cleavage kinetics. *Nat.*  
626 *Biotechnol.* **37**, (2019).
- 627 28. Zetsche, B. *et al.* Cpf1 Is a Single RNA-Guided Endonuclease of a Class 2 CRISPR-Cas System.  
628 *Cell* (2015). doi:10.1016/j.cell.2015.09.038
- 629 29. Li, S. Y., Zhao, G. P. & Wang, J. C-Brick: A New Standard for Assembly of Biological Parts Using  
630 Cpf1. *ACS Synth. Biol.* (2016). doi:10.1021/acssynbio.6b00114
- 631 30. Strohkendl, I., Saifuddin, F. A., Rybarski, J. R., Finkelstein, I. J. & Russell, R. Kinetic Basis for  
632 DNA Target Specificity of CRISPR-Cas12a. *Mol. Cell* (2018). doi:10.1016/j.molcel.2018.06.043
- 633 31. Lei, C. *et al.* The CCTL (Cpf1-assisted Cutting and Taq DNA ligase-assisted Ligation) method for  
634 efficient editing of large DNA constructs in vitro. *Nucleic Acids Res.* (2017).  
635 doi:10.1093/nar/gkx018
- 636 32. Lemos, B. R. *et al.* CRISPR/Cas9 cleavages in budding yeast reveal templated insertions and  
637 strand-specific insertion/deletion profiles. *Proc. Natl. Acad. Sci. U. S. A.* (2018).  
638 doi:10.1073/pnas.1716855115
- 639 33. Shen, M. W. *et al.* Predictable and precise template-free CRISPR editing of pathogenic variants.  
640 *Nature* **563**, (2018).
- 641 34. Allen, F. *et al.* Predicting the mutations generated by repair of Cas9-induced double-strand breaks.  
642 *Nat. Biotechnol.* (2019). doi:10.1038/nbt.4317
- 643 35. Glenn, T. C. Field guide to next-generation DNA sequencers. *Mol. Ecol. Resour.* (2011).



- 644           doi:10.1111/j.1755-0998.2011.03024.x
- 645   36.   Lieber, M. R. The mechanism of double-strand DNA break repair by the nonhomologous DNA  
646       end-joining pathway. *Annual Review of Biochemistry* (2010).  
647       doi:10.1146/annurev.biochem.052308.093131
- 648   37.   Stephenson, A. A., Raper, A. T. & Suo, Z. Bidirectional Degradation of DNA Cleavage Products  
649       Catalyzed by CRISPR/Cas9. *J. Am. Chem. Soc.* (2018). doi:10.1021/jacs.7b13050
- 650   38.   Gao, Z., Fan, M., Das, A. T., Herrera-Carrillo, E. & Berkhout, B. Extinction of all infectious HIV in  
651       cell culture by the CRISPR-Cas12a system with only a single crRNA. *Nucleic Acids Res.* (2020).  
652       doi:10.1093/nar/gkaa226
- 653   39.   Owens, D. D. G. *et al.* Microhomologies are prevalent at Cas9-induced larger deletions. *Nucleic*  
654       *Acids Res.* (2019). doi:10.1093/nar/gkz459
- 655   40.   Mangul, S. *et al.* Challenges and recommendations to improve the installability and archival  
656       stability of omics computational tools. *PLoS Biol.* (2019). doi:10.1371/journal.pbio.3000333
- 657   41.   Lai, Z. *et al.* VarDict: A novel and versatile variant caller for next-generation sequencing in cancer  
658       research. *Nucleic Acids Res.* (2016). doi:10.1093/nar/gkw227
- 659   42.   Li, M. M. *et al.* Standards and Guidelines for the Interpretation and Reporting of Sequence  
660       Variants in Cancer. *J. Mol. Diagnostics* (2017). doi:10.1016/j.jmoldx.2016.10.002
- 661   43.   Krusche, P. *et al.* Best practices for benchmarking germline small-variant calls in human genomes.  
662       *Nat. Biotechnol.* (2019). doi:10.1038/s41587-019-0054-x
- 663   44.   Craig, D. W. *et al.* A somatic reference standard for cancer genome sequencing. *Sci. Rep.* (2016).  
664       doi:10.1038/srep24607
- 665   45.   Marx, V. Cancer: Hunting rare somatic mutations. *Nat. Methods* (2016). doi:10.1038/nmeth.3803
- 666   46.   Wang, T. T. *et al.* High efficiency error suppression for accurate detection of low-frequency  
667       variants. *Nucleic Acids Res.* (2019). doi:10.1093/nar/gkz474

- 668 47. Kamps-Hughes, N. *et al.* ERASE-Seq: Leveraging replicate measurements to enhance ultralow  
669 frequency variant detection in NGS data. *PLoS One* (2018). doi:10.1371/journal.pone.0195272
- 670 48. Hanlon, K. S. *et al.* High levels of AAV vector integration into CRISPR-induced DNA breaks. *Nat.*  
671 *Commun.* (2019). doi:10.1038/s41467-019-12449-2
- 672 49. Norris, A. L. *et al.* Template plasmid integration in germline genome-edited cattle. *Nat. Biotechnol.*  
673 (2020). doi:10.1038/s41587-019-0394-6
- 674 50. Stadtmauer, E. A. *et al.* CRISPR-engineered T cells in patients with refractory cancer. *Science*  
675 (80- ). (2020). doi:10.1126/science.aba7365
- 676 51. Kosicki, M., Tomberg, K. & Bradley, A. Repair of double-strand breaks induced by CRISPR–Cas9  
677 leads to large deletions and complex rearrangements. *Nat. Biotechnol.* (2018).  
678 doi:10.1038/nbt.4192
- 679 52. Leenay, R. T. *et al.* Large dataset enables prediction of repair after CRISPR–Cas9 editing in  
680 primary T cells. *Nat. Biotechnol.* **37**, (2019).
- 681 53. Jacobi, A. M. *et al.* Simplified CRISPR tools for efficient genome editing and streamlined protocols  
682 for their delivery into mammalian cells and mouse zygotes. *Methods* (2017).  
683 doi:10.1016/j.ymeth.2017.03.021
- 684 54. Köster, J. & Rahmann, S. Snakemake—a scalable bioinformatics workflow engine. *Bioinformatics*  
685 (2012). doi:10.1093/bioinformatics/bts480
- 686 55. Amstutz, P. *et al.* Common Workflow Language Specifications, v1.0. *Figshare* (2016).  
687 doi:10.6084/m9.figshare.3115156.v2
- 688 56. Quinlan, A. R. & Hall, I. M. BEDTools: A flexible suite of utilities for comparing genomic features.  
689 *Bioinformatics* (2010). doi:10.1093/bioinformatics/btq033
- 690 57. Chen, S., Zhou, Y., Chen, Y. & Gu, J. Fastp: An ultra-fast all-in-one FASTQ preprocessor. in  
691 *Bioinformatics* (2018). doi:10.1093/bioinformatics/bty560

- 692 58. Magoč, T. & Salzberg, S. L. FLASH: Fast length adjustment of short reads to improve genome  
693 assemblies. *Bioinformatics* (2011). doi:10.1093/bioinformatics/btr507
- 694 59. Li, H. Minimap2: Pairwise alignment for nucleotide sequences. *Bioinformatics* (2018).  
695 doi:10.1093/bioinformatics/bty191
- 696 60. Barnett, D. W., Garrison, E. K., Quinlan, A. R., Střimberg, M. P. & Marth, G. T. Bamtools: A C++  
697 API and toolkit for analyzing and managing BAM files. *Bioinformatics* (2011).  
698 doi:10.1093/bioinformatics/btr174
- 699 61. Needleman, S. B. & Wunsch, C. D. A general method applicable to the search for similarities in  
700 the amino acid sequence of two proteins. *J. Mol. Biol.* (1970). doi:10.1016/0022-2836(70)90057-4
- 701 62. Cock, P. J. A. *et al.* Biopython: Freely available Python tools for computational molecular biology  
702 and bioinformatics. *Bioinformatics* (2009). doi:10.1093/bioinformatics/btp163
- 703 63. Schimmel, J., van Schendel, R., den Dunnen, J. T. & Tijsterman, M. Templated Insertions: A  
704 Smoking Gun for Polymerase Theta-Mediated End Joining. *Trends in Genetics* (2019).  
705 doi:10.1016/j.tig.2019.06.001
- 706 64. Mu, J. C. *et al.* VarSim: A high-fidelity simulation and validation framework for high-throughput  
707 genome sequencing with cancer applications. *Bioinformatics* (2015).  
708 doi:10.1093/bioinformatics/btu828
- 709 65. Huang, W., Li, L., Myers, J. R. & Marth, G. T. ART: A next-generation sequencing read simulator.  
710 *Bioinformatics* (2012). doi:10.1093/bioinformatics/btr708
- 711 66. Armbruster, D. A. & Pry, T. Limit of blank, limit of detection and limit of quantitation. *Clin. Biochem.*  
712 *Rev.* (2008).
- 713
- 714
- 715

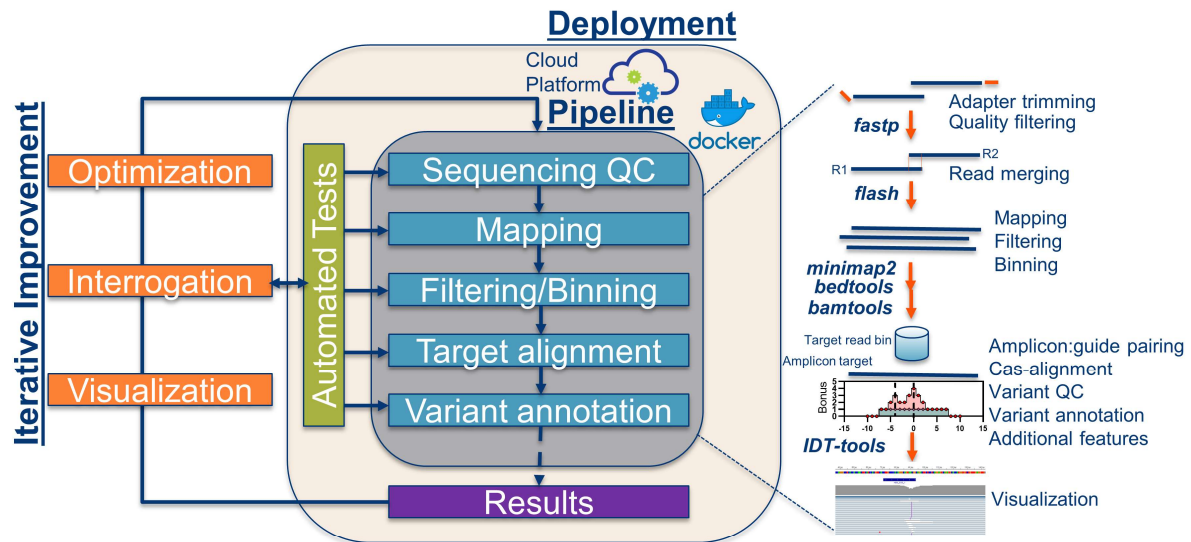

**Figure 1. Development framework for CRISPAItRations.** CRISPAItRations was architected such that each step of the pipeline (grey box) is containerized and deployed within the cloud to enable highly scalable batch processing (tan box). Briefly, the pipeline goes through a number of processing steps (blue boxes) to transform demultiplexed reads to results that quantify editing events after CRISPR genome editing (purple box) which can be viewed and stored in the cloud or downloaded locally. To improve CRISPAItRations, we used iterative improvement (orange boxes) to iterate through a process in which we manually inspected and interrogated experimental results to build tests (green box) which ensure stability, coverage of different experimental use-cases, and allowed us to optimize the software tool.

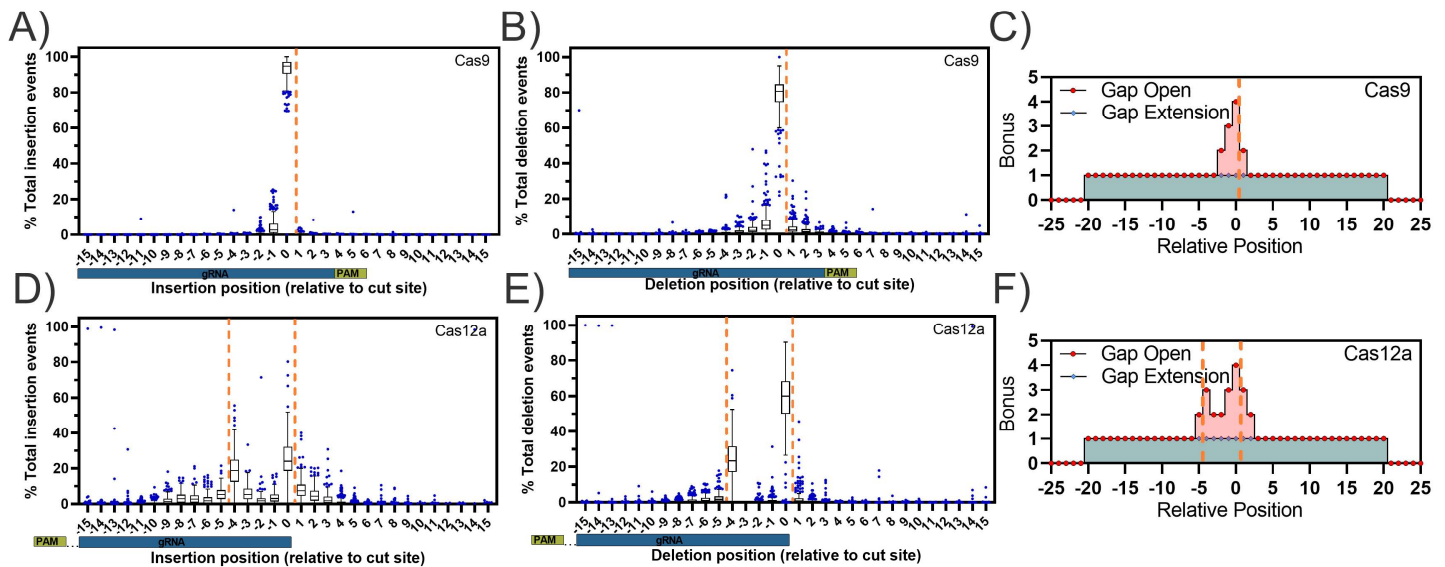

**Figure 2. Characterization of Cas9 and Cas12a-specific indel profiles for aligner creation (Software iteration #3).** Tukey box and whisker plot of A/D) insertion position and B/E) deletion position relative to the cut/nick site(s) (orange dashed line) derived using C/F) an integrated scoring vector to apply a position-specific bonus to gap open and gap extension events to preferentially select secondary alignments representing the most likely event to occur biologically for Alt-R S.p. Cas9 V3 (n=273 guides) and Alt-R A.s. Cas12a Ultra V3 (n=243 guides) editing events delivered via ribonucleoprotein electroporation into Jurkat cells analyzed using software iteration #3.

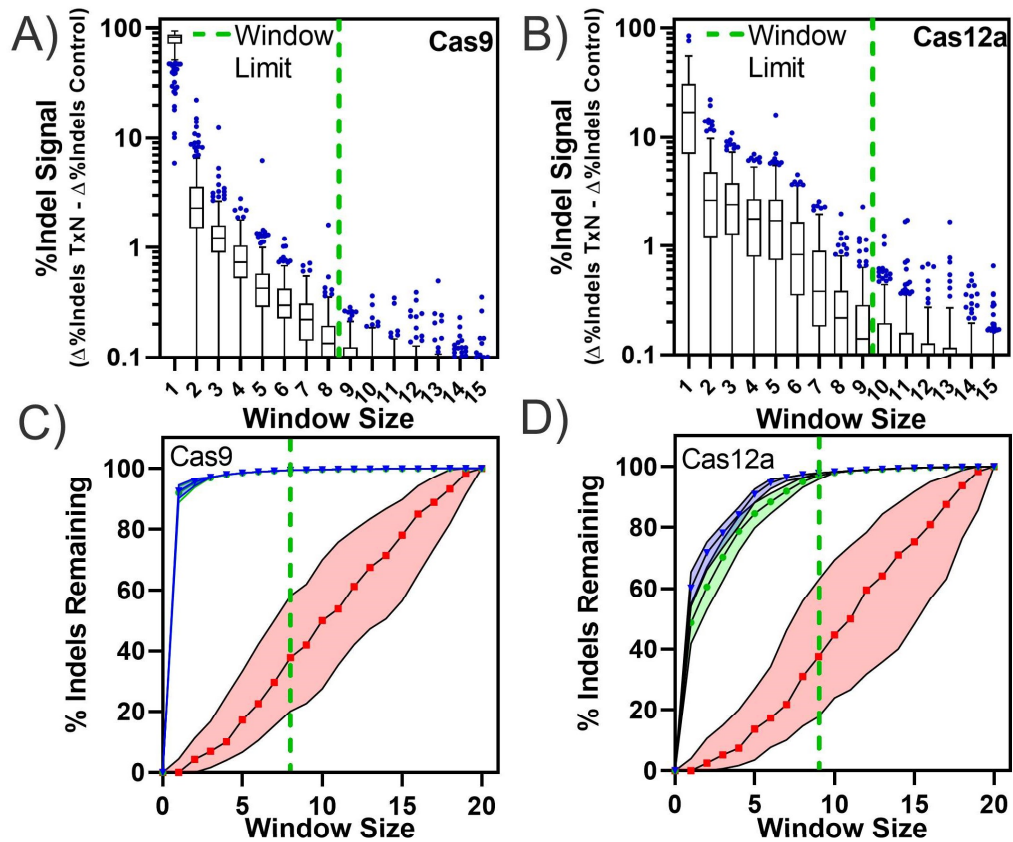

**Figure 3. Selection of an optimal variant detection window size.** An optimal limit for the variant detection window size (green dashed line) for annotating variants was selected for A) Alt-R S.p. Cas9 V3 (n=273) and B) Alt-R A.s. Cas12a Ultra V3 (n=243; Cas12a window center shifted -3 bp 5' from PAM-distal nick site) at which median indel signal differences between treatment and control samples was < 0.1%. C/D) The effects of window size on total indels annotated (relative to a window size of 20) was calculated for unedited (red), edited samples with software iteration #2 (green) and edited samples with software iteration #3 (blue).

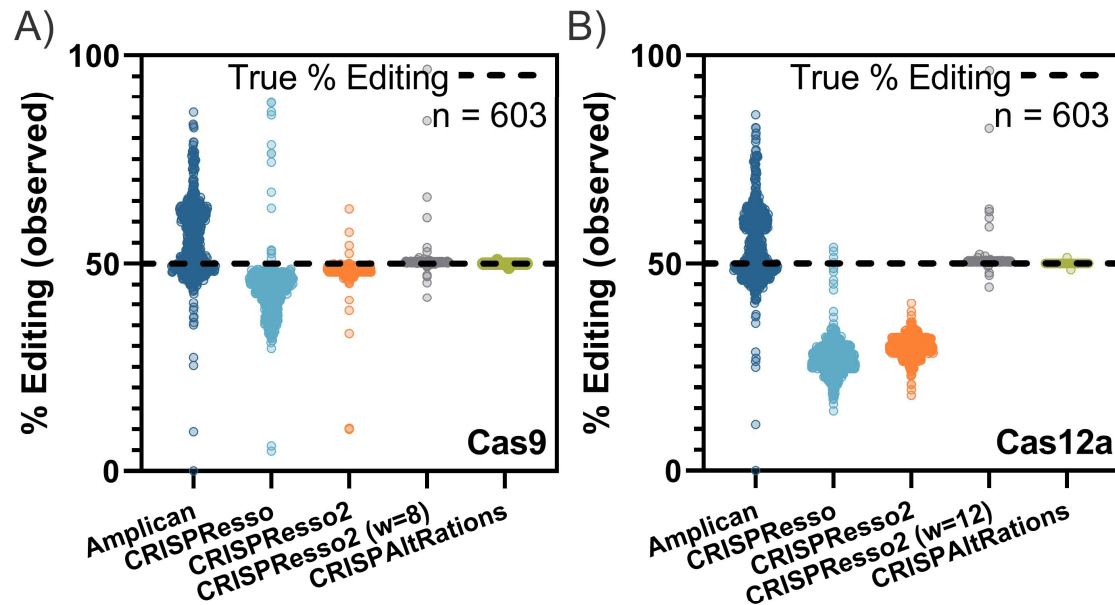

**Figure 4. Benchmarking current pipelines supporting multiplex on/off-target analysis.** Publicly available tools that easily support multiplex analysis were compared to CRISPAItRations using synthetic data (Figure S6; n=603 sites) generated for A) Cas9 and B) Cas12a for the ability to accurately determine % editing at each site (open circles) with a ground truth of 50% editing (black dashed line). *w*, window size.

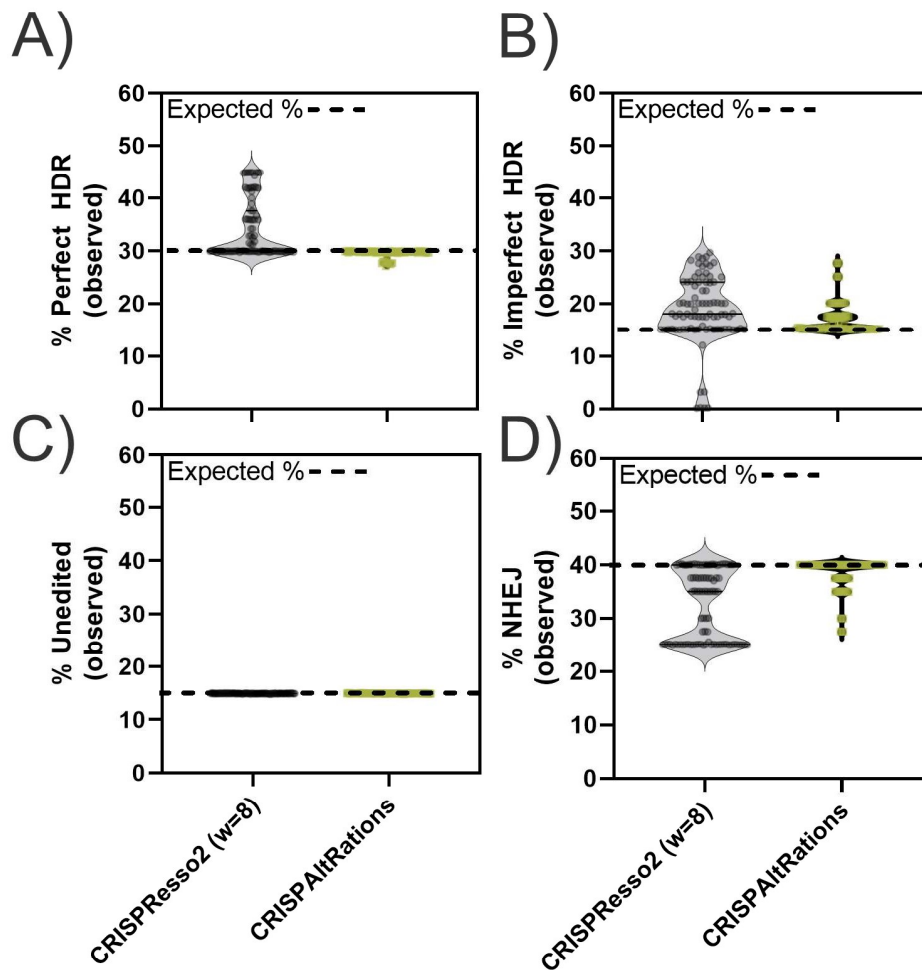

**Figure 5. Benchmarking on-target HDR annotation accuracy.** CRISPResso2 and CRISPAItRations were compared using a synthetic dataset (n=91 sites) for the ability to accurately determine the percentage of events derived from A) perfect HDR B) imperfect HDR (HDR event with any unintended mutations) C) wildtype and D) NHEJ at all edited sites. w, window size.



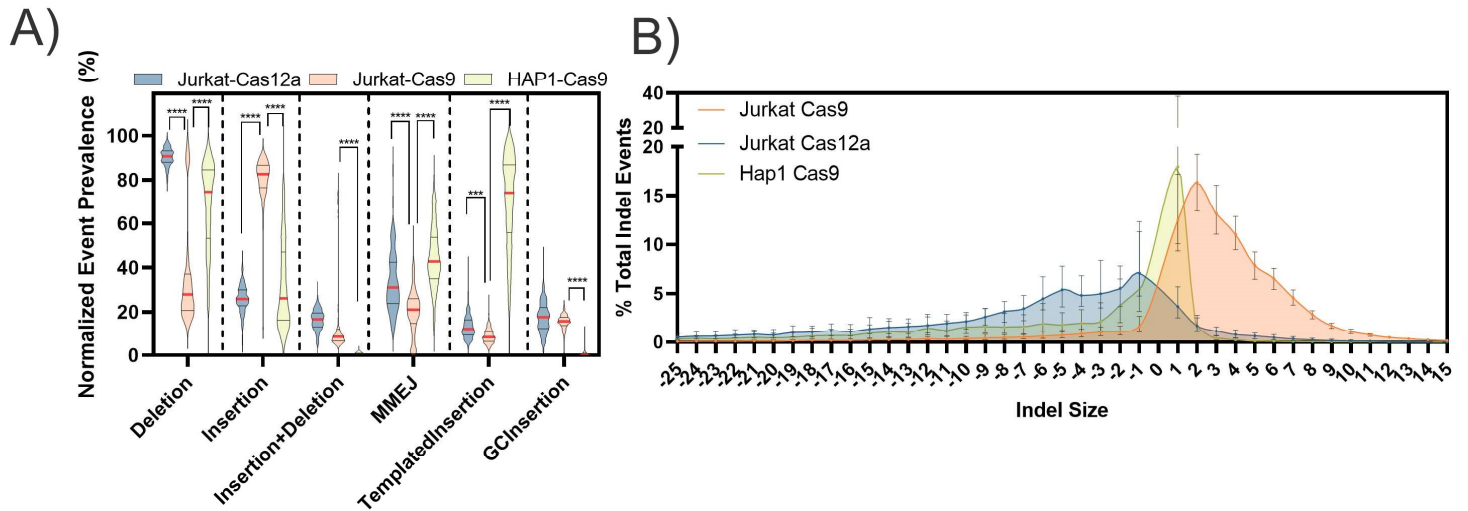

**Figure 6. Characterization of cell-line/enzyme specific repair pathways.** A) Normalized occurrence of different characterized indel repair events and B) median indel size +/- interquartile range for Alt-R S.p. Cas9 V3 or Alt-R A.s. Cas12a Ultra V3 delivered to Jurkat or HAP1 cells. MMEJ, Microhomology-mediated end-joining.

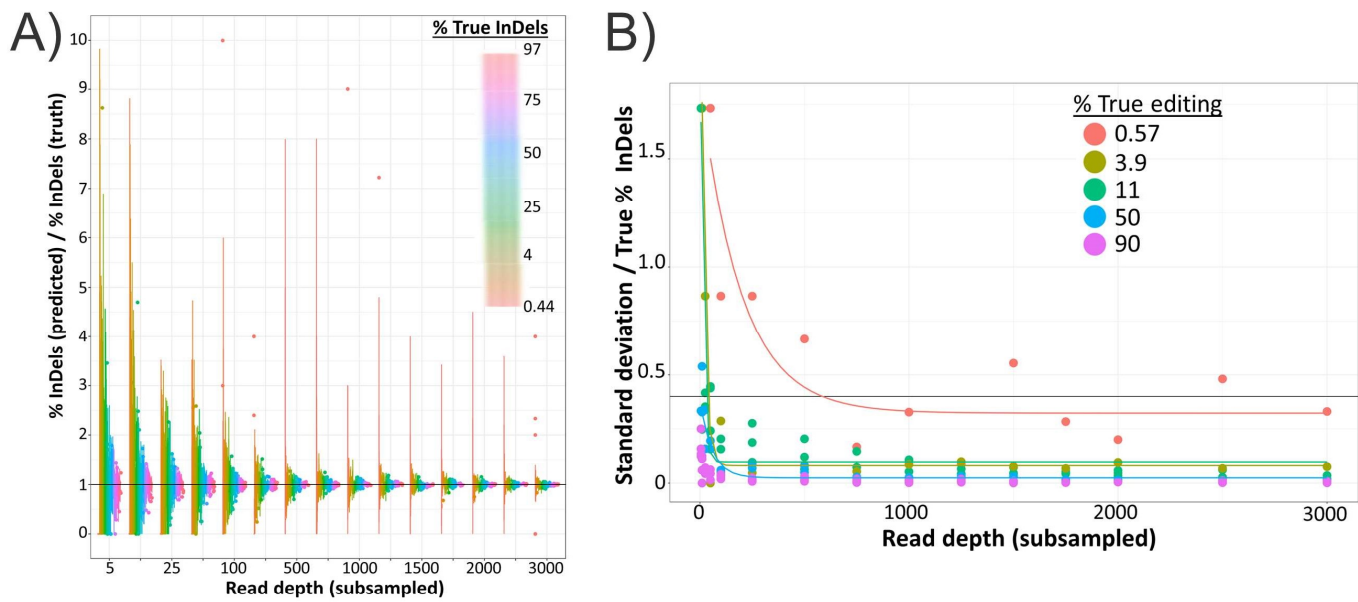

**Figure 7. Read depth requirements for variable levels of precision.** Subsampling of 284 CRISPR editing experiments with varying editing efficiencies (>0.5% editing) to variable read depths in triplicate with comparison of A) subsampled % indels and B) standard deviation to unsubsampled (i.e., full depth) results.

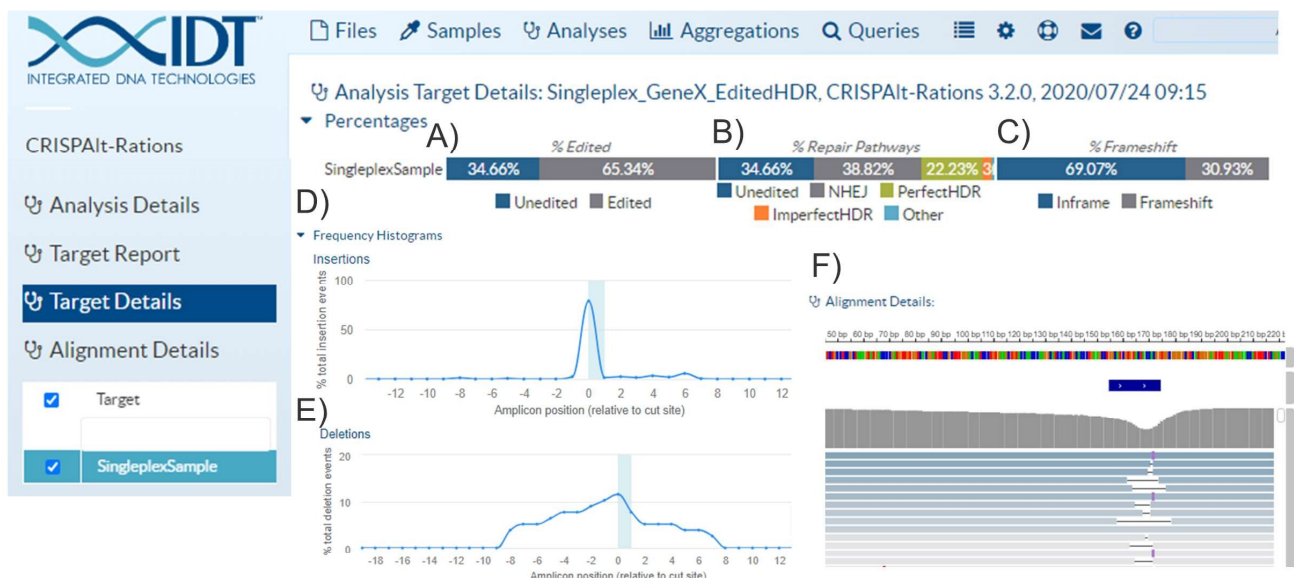

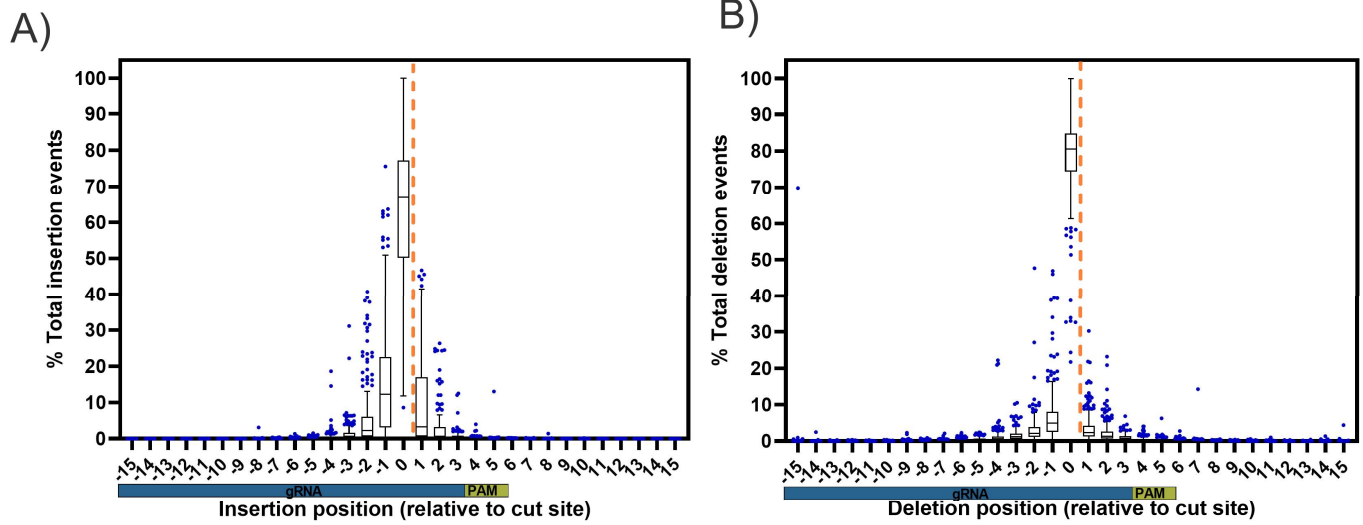

**Figure S1. Characterization of Cas9-specific indel profiles for using the standard Needleman-Wunsch alignment algorithm (Software iteration #1).** Tukey box and whisker plot of A) insertion position, and B) deletion position profiles relative to the cut site (orange dashed line) of Alt-R S.p. Cas9 V3 (n=273 guides) editing events delivered via ribonucleoprotein nucleofection into Jurkat cells analyzed using software iteration #1.

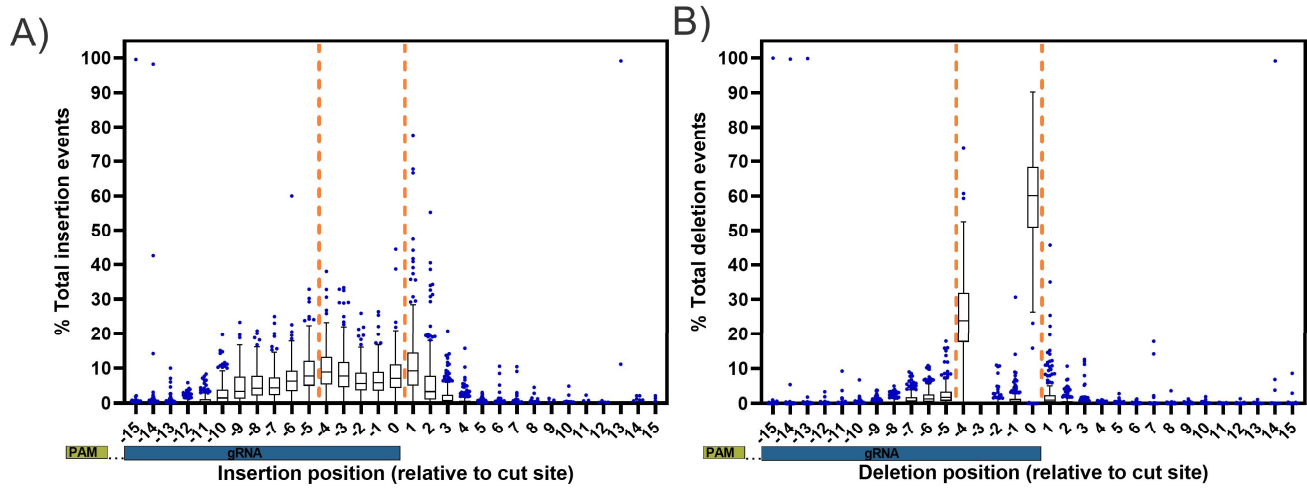

**Figure S2. Characterization of Cas12a-specific indel profiles using the standard Needleman-Wunsch alignment algorithm (Software iteration #1).** Tukey box and whisker plot of A) insertion position, and B) deletion position profiles relative to the putative nick sites (orange dashed line) of Alt-R A.s. Cas12a Ultra V3 (n=243 guides) editing events delivered via ribonucleoprotein electroporation into Jurkat cells analyzed using software iteration #1.

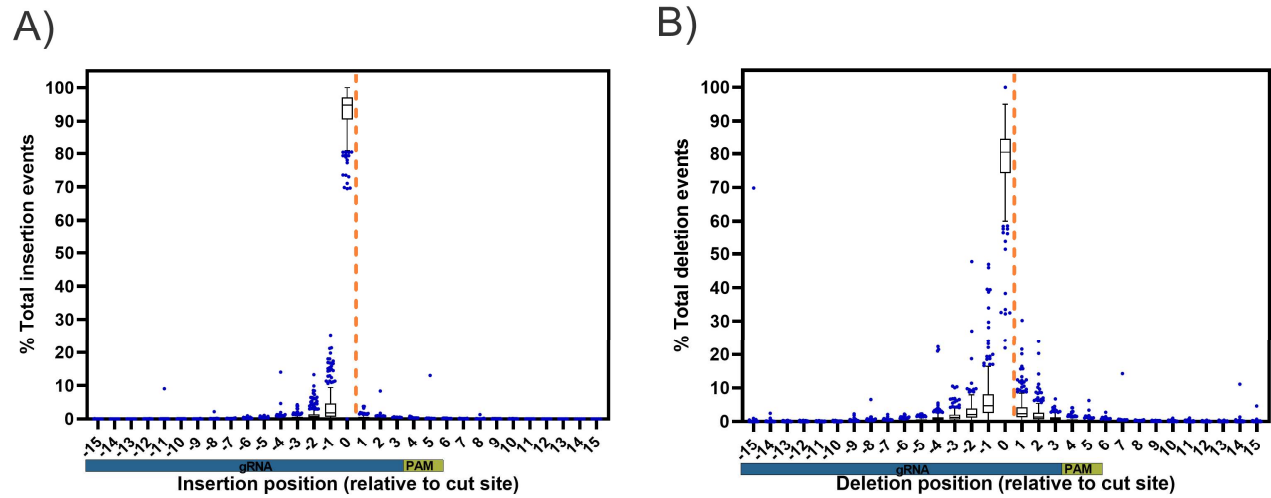

**Figure S3. Characterization of Cas9-specific indel profiles for using psnw alignment algorithm with a single cut site bonus (Software iteration #2).** Tukey box and whisker plot of A) insertion position, B) deletion position profiles relative to the cut site (orange dashed line) of Alt-R S.p. Cas9 V3 (n=273 guides) editing events delivered via ribonucleoprotein electroporation into Jurkat cells analyzed using software iteration #2.

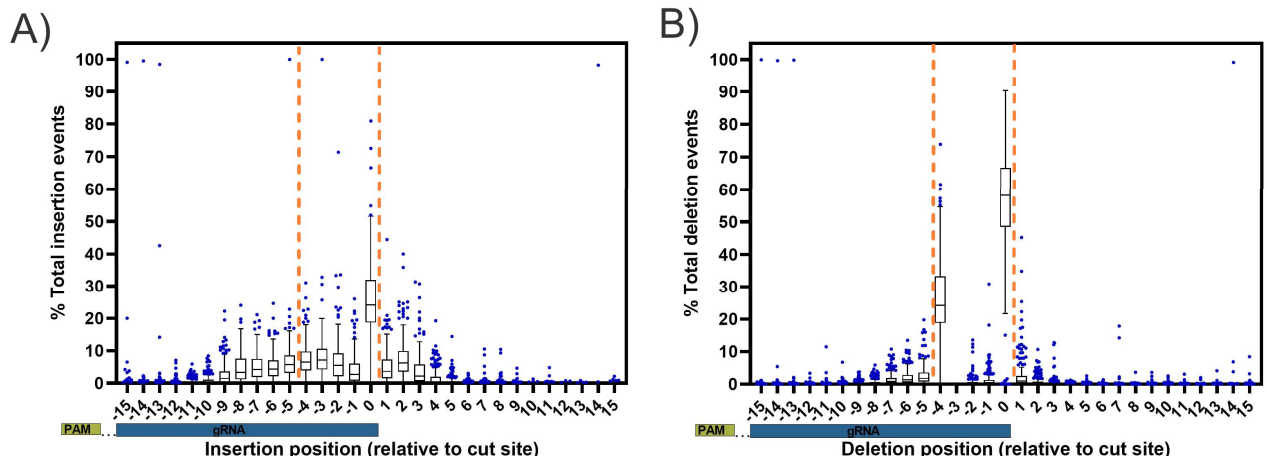

**Figure S4. Characterization of Cas12a-specific indel profiles using psnw with a single PAM distal cut site bonus (Software iteration #2).** Tukey box and whisker plot of A) insertion position, and B) deletion position profiles relative to the putative nick sites (orange dashed line) of Alt-R A.s. Cas12a Ultra V3 (n=243 guides) editing events delivered via ribonucleoprotein electroporation into Jurkat cells analyzed using software iteration #2.

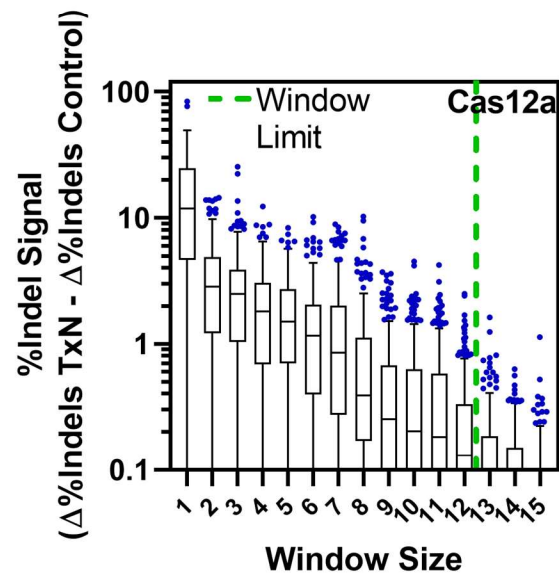

**Figure S5. Window optimization AsCas12a centered at the PAM-distal nick site.** An optimal window size (green dashed line) for annotating variants was selected for Alt-R A.s. Cas12a Ultra V3 editing in Jurkat cells at which median indel signal differences between treatment and control samples < 0.1%, with the window centered at the PAM-distal nick site.



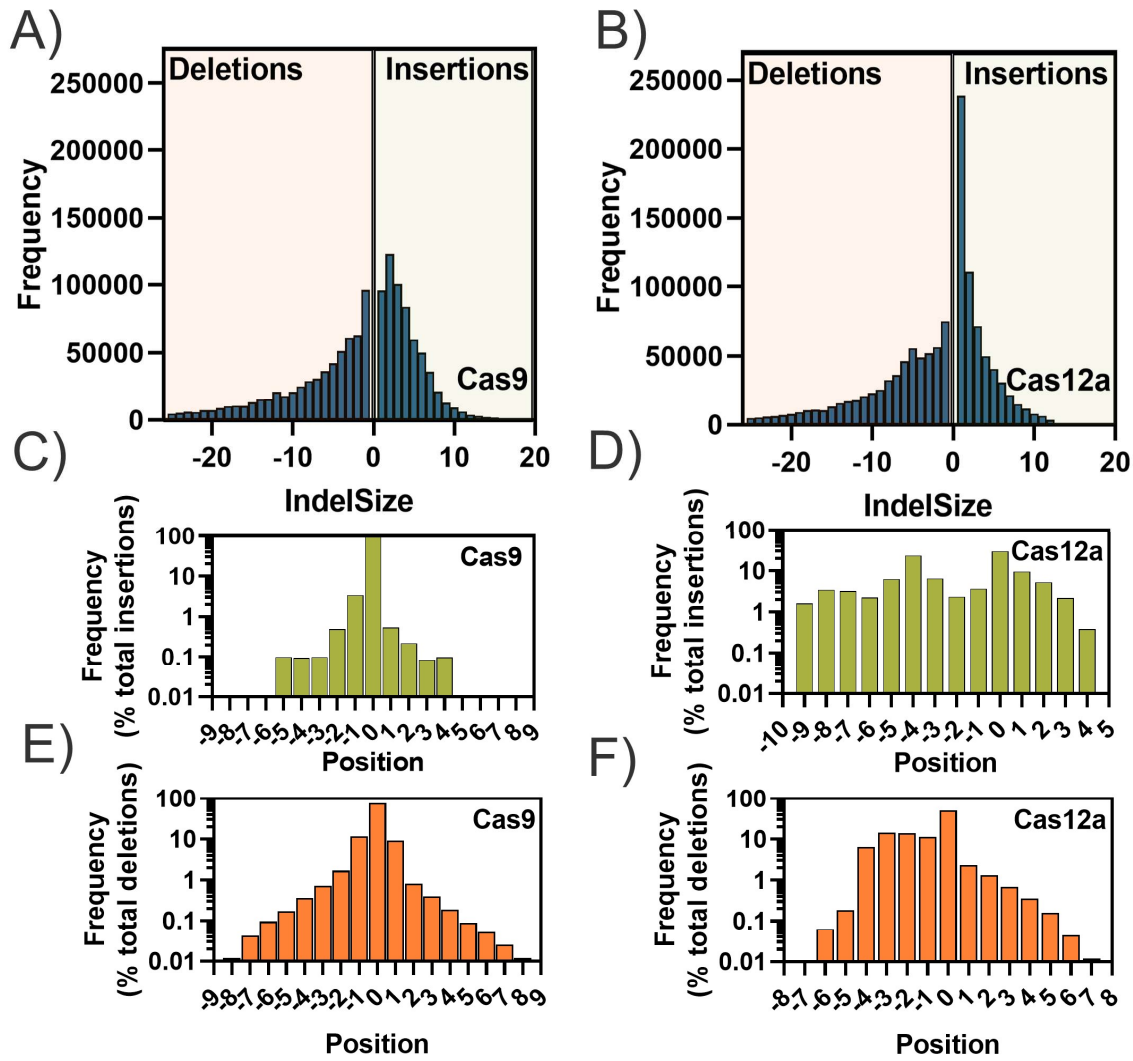

**Figure S6. Synthetic on/off-target dataset used for pipeline validation.** Characterization of synthetic CRISPR NGS on/off-target benchmarking data A-B) indel sizes, C-D) insertion positions, and E-F) deletion positions, all modeled based on experimental Alt-R S.p. Cas9 V3 or Alt-R A.s. Cas12a Ultra V3 editing data in Jurkat cells.

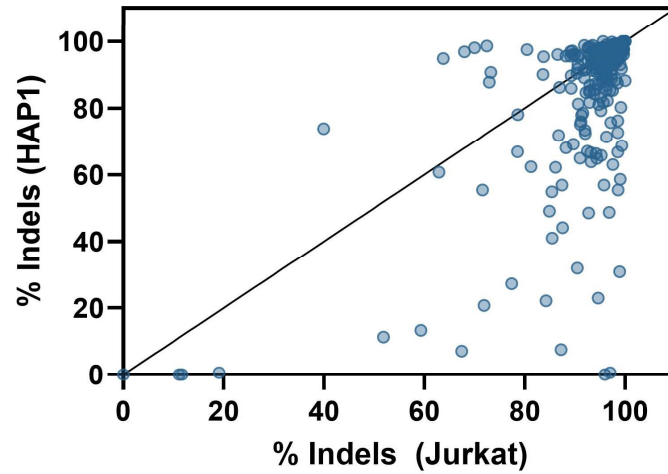

**Figure S7. HiFi Cas9 editing in HAP1 and Jurkat Cells.** Quantification and comparison of indel editing by CRISPAItRations in HAP1 and Jurkat cell lines with Alt-R S.p. Cas9 V3 delivered via ribonucleoprotein (n=273 unique gRNAs).

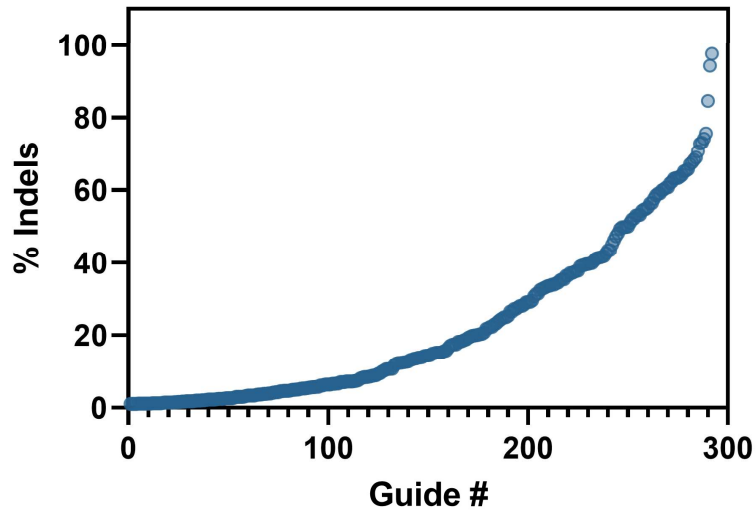

**Figure S8. AsCas12a editing efficiency in Jurkat.** Quantification of editing by CRISPAItRations in Jurkat delivered Alt-R A.s. Cas12a Ultra V3 via ribonucleoprotein electroporation at a suboptimal concentration (n=243 unique gRNAs)

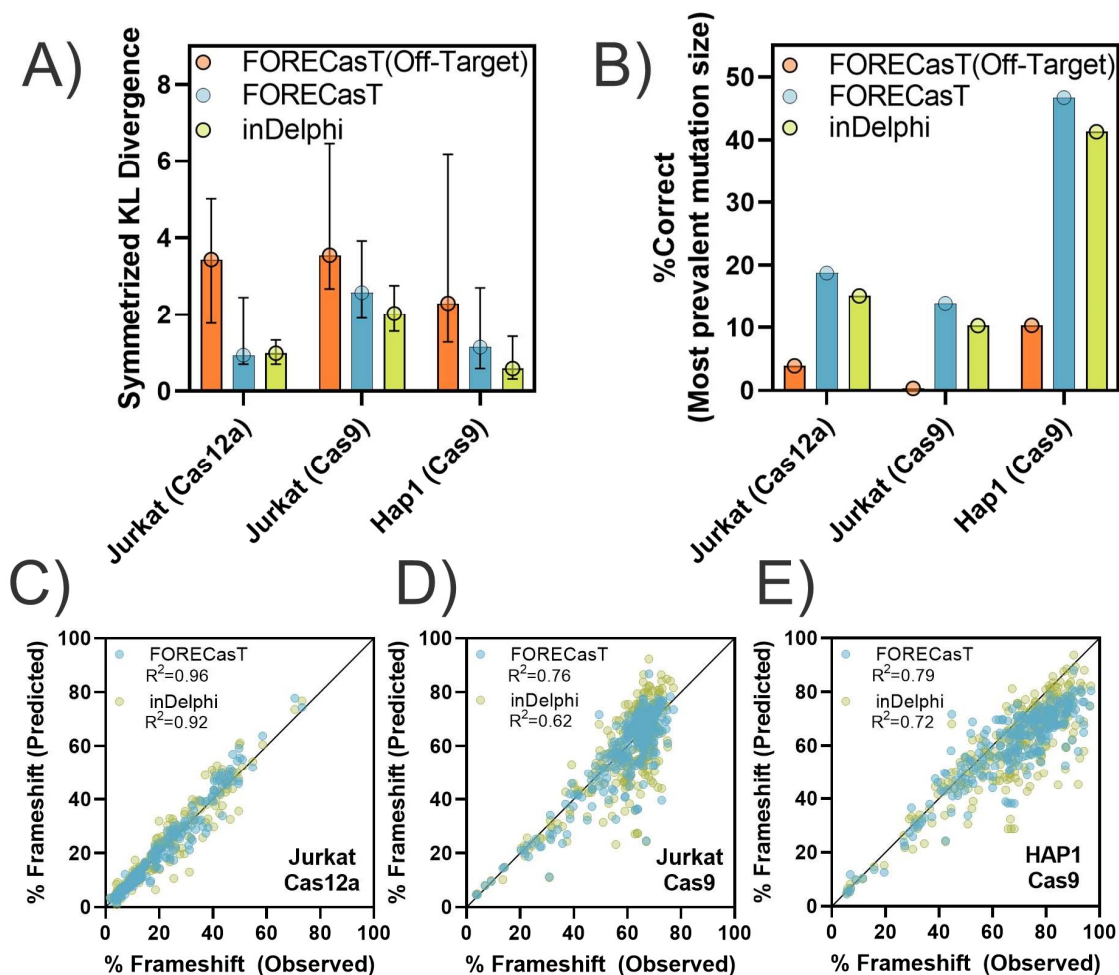

**Figure S9. Performance of *in-silico* mutation profile prediction tools.** FORECasT and inDelphi were evaluated for the ability to predict mutation size distributions similar to what was observed Jurkat/HAP1 cells treated with Alt-R S.p. Cas9 V3 Cas9 or Alt-R A.s. Cas12a Ultra V3 by measuring A) symmetrized KL divergence between observed and predicted profiles (median +/- IQR) and B) the mean accuracy predicting the most prevalent mutation. Linear regression was performed using predicted vs observed frameshift frequencies for C) Jurkat + Cas12a D) Jurkat + Cas9 and E) HAP1 + Cas9 treated cells with a line of identity (solid black line) displayed at  $y = x$ .

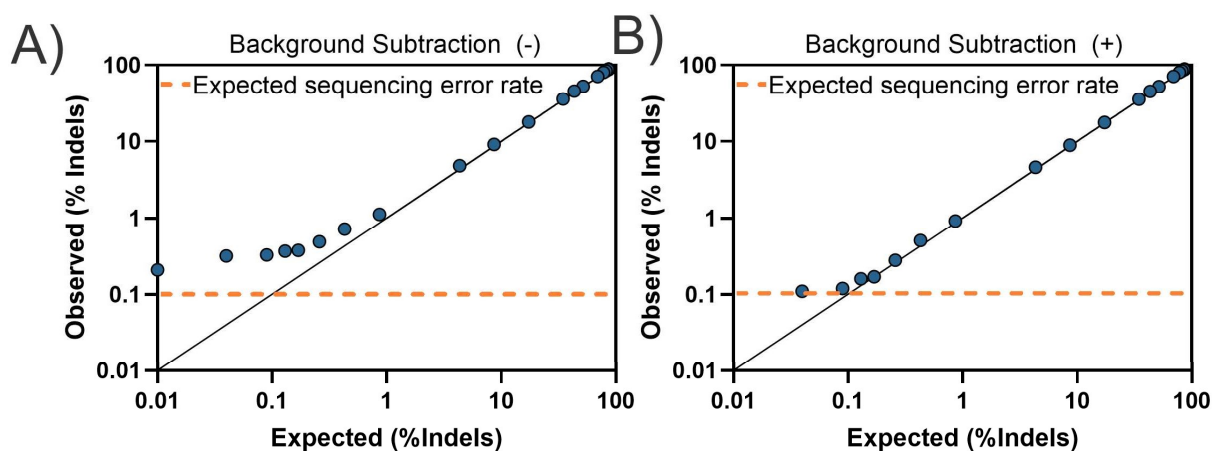

**Figure S10. Pipeline indel detection sensitivity.** Pipeline indel detection concordance (black line) with a titrated mixture of gBlocks with known concentrations of indels for an HPRT target (>40,000 reads per sample) sequenced with MiSeq v3 chemistry A) before and B) after a simple background subtraction, performed by subtracting the percent indels observed in an unmodified gBlock control from all samples.

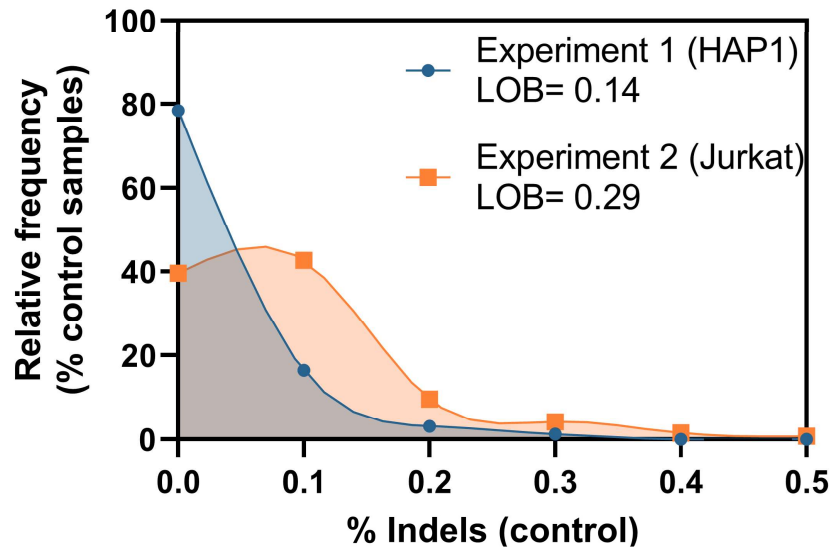

**Figure S11. Evaluation of indel background noise in two experiments.** Relative frequency of unedited control samples with variable indel editing signal (binned in 0.1% intervals) for the same genomic targets from Jurkat (n=260) and HAP1 (n=158) cell lines in two separate experiments with high read depth (> 10,000 read pairs). Limit of Blank; LOB

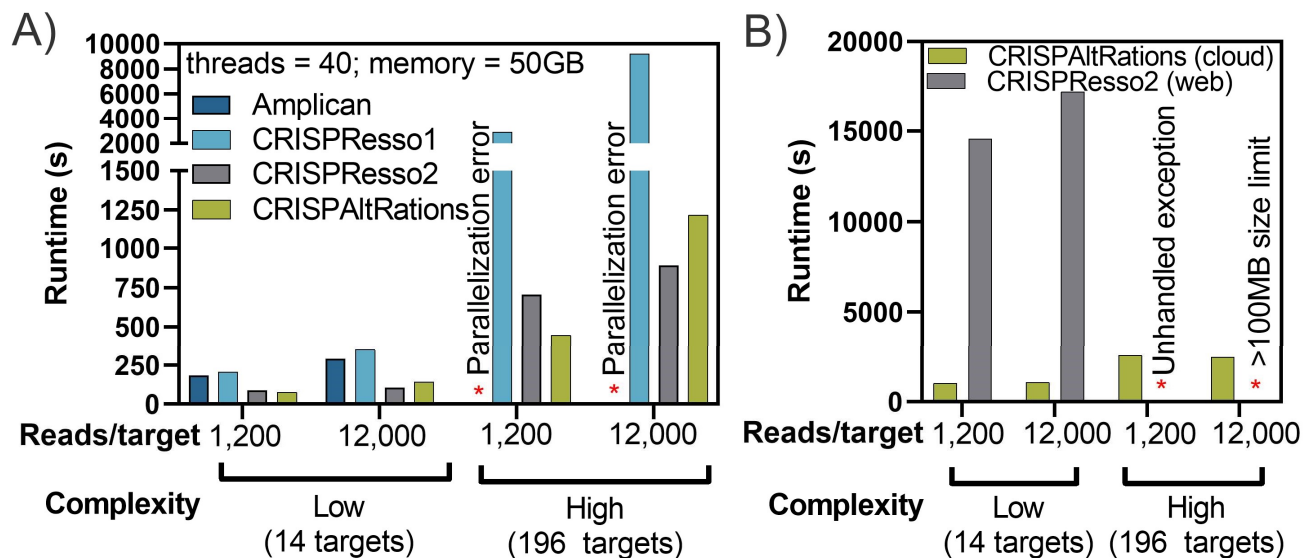

**Figure S12. Pipeline runtime requirements.** All multiplex compatible pipelines were ran against synthetic multiplex on/off-target datasets with 14 or 196 targets at varying read depth. Runtime in seconds was recorded for A) Command line interface and B) Web UI runs. Runs that failed submission or analysis are indicated (\*).
